# Supplementary material for: Efficacy of artemisinin-based and quinine-based treatments for uncomplicated falciparum malaria in pregnancy: a protocol for systematic review and individual patient data (IPD) meta-analysis
Source: PubMed Central journal article supplement (PMC6707703; doi:10.1136/bmjopen-2018-027503), 2019-08-22
Supplement: bmjopen-2018-027503.draft_revisions.pdf [file bmjopen-2018-027503.draft_revisions.pdf]

# BMJ Open

BMJ Open is committed to open peer review. As part of this commitment we make the peer review history of every article we publish publicly available.

When an article is published we post the peer reviewers' comments and the authors' responses online. We also post the versions of the paper that were used during peer review. These are the versions that the peer review comments apply to.

The versions of the paper that follow are the versions that were submitted during the peer review process. They are not the versions of record or the final published versions. They should not be cited or distributed as the published version of this manuscript.

BMJ Open is an open access journal and the full, final, typeset and author-corrected version of record of the manuscript is available on our site with no access controls, subscription charges or pay-per-view fees (<http://bmjopen.bmj.com>).

If you have any questions on BMJ Open's open peer review process please email [info.bmjopen@bmj.com](mailto:info.bmjopen@bmj.com)

# BMJ Open

## The efficacy of artemisinin-based and quinine-based treatments for uncomplicated falciparum malaria in pregnancy: a protocol for systematic review and individual patient data (IPD) meta-analysis

|                               |                                                                                                                                                                                                                                                                                                                                                                                                                                                                                                                                                                                                                                                                                                                                                                                                                                                                                                                                                                                                                                                                                                                                                                                                                                                                                                                                                                                                                 |
|-------------------------------|-----------------------------------------------------------------------------------------------------------------------------------------------------------------------------------------------------------------------------------------------------------------------------------------------------------------------------------------------------------------------------------------------------------------------------------------------------------------------------------------------------------------------------------------------------------------------------------------------------------------------------------------------------------------------------------------------------------------------------------------------------------------------------------------------------------------------------------------------------------------------------------------------------------------------------------------------------------------------------------------------------------------------------------------------------------------------------------------------------------------------------------------------------------------------------------------------------------------------------------------------------------------------------------------------------------------------------------------------------------------------------------------------------------------|
| Journal:                      | <i>BMJ Open</i>                                                                                                                                                                                                                                                                                                                                                                                                                                                                                                                                                                                                                                                                                                                                                                                                                                                                                                                                                                                                                                                                                                                                                                                                                                                                                                                                                                                                 |
| Manuscript ID                 | bmjopen-2018-027503                                                                                                                                                                                                                                                                                                                                                                                                                                                                                                                                                                                                                                                                                                                                                                                                                                                                                                                                                                                                                                                                                                                                                                                                                                                                                                                                                                                             |
| Article Type:                 | Protocol                                                                                                                                                                                                                                                                                                                                                                                                                                                                                                                                                                                                                                                                                                                                                                                                                                                                                                                                                                                                                                                                                                                                                                                                                                                                                                                                                                                                        |
| Date Submitted by the Author: | 25-Oct-2018                                                                                                                                                                                                                                                                                                                                                                                                                                                                                                                                                                                                                                                                                                                                                                                                                                                                                                                                                                                                                                                                                                                                                                                                                                                                                                                                                                                                     |
| Complete List of Authors:     | Saito, Makoto; WorldWide Antimalarial Resistance Network (WWARN), ; University of Oxford, Centre for Tropical Disease and Global Health, Nuffield Department of Medicine<br>Mansoor, Rashid; WorldWide Antimalarial Resistance Network (WWARN); University of Oxford, Centre for Tropical Disease and Global Health, Nuffield Department of Medicine<br>Kennon, Kalynn; WorldWide Antimalarial Resistance Network (WWARN); University of Oxford, Centre for Tropical Disease and Global Health, Nuffield Department of Medicine<br>McGready, Rose; Shoklo Malaria Research Unit, Mahidol-Oxford Tropical Medicine Research Unit, Faculty of Tropical Medicine, Mahidol University; Centre for Tropical Medicine and Global Health, Nuffield Department of Medicine, University of Oxford<br>Nosten, François; Centre for Tropical Medicine and Global Health, Nuffield Department of Medicine, University of Oxford; Shoklo Malaria Research Unit, Mahidol-Oxford Tropical Medicine Research Unit, Faculty of Tropical Medicine, Mahidol University<br>Guerin, Philippe; WorldWide Antimalarial Resistance Network (WWARN); University of Oxford, Centre for Tropical Disease and Global Health, Nuffield Department of Medicine<br>Stepniewska, Kasia; WorldWide Antimalarial Resistance Network (WWARN); University of Oxford, Centre for Tropical Disease and Global Health, Nuffield Department of Medicine |
| Keywords:                     | malaria, pregnancy, treatment efficacy, individual patient data meta-analysis, artemisinin, quinine                                                                                                                                                                                                                                                                                                                                                                                                                                                                                                                                                                                                                                                                                                                                                                                                                                                                                                                                                                                                                                                                                                                                                                                                                                                                                                             |
|                               |                                                                                                                                                                                                                                                                                                                                                                                                                                                                                                                                                                                                                                                                                                                                                                                                                                                                                                                                                                                                                                                                                                                                                                                                                                                                                                                                                                                                                 |

SCHOLARONE™  
Manuscripts

1 The efficacy of artemisinin-based and quinine-based treatments for uncomplicated  
2 falciparum malaria in pregnancy: a protocol for systematic review and individual patient data  
3 (IPD) meta-analysis

4  
5 Makoto Satio<sup>1,2,\*</sup>, Rashid Mansoor<sup>1,2</sup>, Kalynn Kennon<sup>1,2</sup>, Rose McGready<sup>2,3</sup>, François  
6 Nosten<sup>2,3</sup>, Philippe J Guérin<sup>1,2</sup>, Kasia Stepniewska<sup>1,2</sup>

7  
8 <sup>1</sup>WorldWide Antimalarial Resistance Network (WWARN), Oxford, UK

9 <sup>2</sup>Centre for Tropical Medicine and Global Health, Nuffield Department of Clinical  
10 Medicine, University of Oxford, Oxford, UK

11 <sup>3</sup>Shoklo Malaria Research Unit (SMRU), Mahidol-Oxford Tropical Medicine Research  
12 Unit, Faculty of Tropical Medicine, Mahidol University, Mae Sot, Tak, Thailand

13  
14 \* Corresponding to Makoto Saito

15 Address: Centre for Tropical Medicine and Global Health, NDM Research Building, Old Road  
16 Campus, Roosevelt Drive, Oxford, OX3 7FZ, UK

17 Tel: +44-01865 612900

18 E-mails: [makoto.saito@wwarn.org](mailto:makoto.saito@wwarn.org) (MS), [rashid.mansoor@wwarn.org](mailto:rashid.mansoor@wwarn.org) (RM),  
19 [kalynn.kennon@wwarn.org](mailto:kalynn.kennon@wwarn.org) (KK), [rose@shoklo-unit.com](mailto:rose@shoklo-unit.com) (RoM), [francois@tropmedres.ac](mailto:francois@tropmedres.ac) (FN),  
20 [philippe.guerin@wwarn.org](mailto:philippe.guerin@wwarn.org) (PG), [kasia.stepniewska@wwarn.org](mailto:kasia.stepniewska@wwarn.org) (KS)

21  
22 Word count: 2957

23 Key words: malaria, pregnancy, treatment efficacy, individual patient data meta-analysis,  
24 artemisinin, quinine

## 25 Abstract

### 26 *Introduction*

27 Pregnant women are more vulnerable to malaria leading to adverse impact on both mothers  
28 and fetuses. However, knowledge on the efficacy and safety of antimalarials in pregnancy is  
29 limited by the paucity of randomised control trials and the lack of standardised protocols in this  
30 sub-population. Pooling individual patient data (IPD) for meta-analysis could address in part these  
31 limitations to summarise accurately the currently available evidence on treatment efficacy and risk  
32 factors of treatment failure.

### 33 *Methods and analysis*

34 To assess the treatment efficacy of artemisinin-based and quinine-based treatments for  
35 uncomplicated falciparum malaria in pregnancy, seven databases (MEDLINE, Embase, Global  
36 Health, Cochrane Library, Scopus, Web of Science and LILACS) and two clinical trial registries  
37 (ICTRP and ClinicalTrial.gov) were searched. Both interventional and observational cohort  
38 studies following up for at least 28 days will be included. IPD of the identified eligible published  
39 or unpublished studies will be sought by inviting principal investigators. Raw IPD will be shared  
40 through the web-based secure platform developed by WorldWide Antimalarial Resistance  
41 Network (WWARN) using the established methodology. The primary objective is to compare the  
42 risk of polymerase chain reaction (PCR)-corrected treatment failure among different treatments  
43 and to find the risk factors. One-stage IPD meta-analysis by Cox model with shared frailty will be  
44 conducted. Sensitivity analyses will assess the effect of studies with different study designs and  
45 also those whose IPD are not obtained.

## 46 *Ethics and Dissemination*

47 This IPD meta-analysis consists of secondary analysis of existing anonymous data and  
48 meets the criteria for waiver of ethical review by the Oxford Tropical Research Ethics Committee.  
49 The results of this IPD meta-analysis will be disseminated through open-access publications at  
50 peer-reviewed journals. The study results will lead to better understanding of malaria treatment in  
51 pregnancy, which can be used for clinical decision-making and conducting further studies.

52 *PROSPERO registration number: CRD42018104013.*

## 53 Article Summary

### 54 *Strengths and limitations of this study*

- 55 • The research on the efficacy of antimalarials in pregnancy has been restricted by the paucity  
56 of randomised control trials and the lack of a standard study design for pregnancy.
- 57 • This will be the first individual patient data (IPD) meta-analysis on the efficacy of currently  
58 recommended antimalarials in pregnancy incorporating IPD from both interventional and  
59 observational cohort studies.
- 60 • IPD that are standardised in the same format and analysed in a uniform way with  
61 adjustment of covariates, will allow us to compare the efficacy of different treatment as  
62 well as to find risk factors of treatment failure in this vulnerable but neglected population.
- 63 • The collection of IPD globally will ensure the generalisability of the results.

- 1  
2  
3 64 • Limitations of this IPD meta-analysis include the potential difficulty in acquiring the IPD  
4  
5 65 and the heterogeneity of the study designs, study population and parasite population. A risk  
6  
7 66 of bias analysis will be conducted to address the impact of potential unshared data.  
8  
9  
10  
11  
12  
13  
14  
15  
16  
17  
18  
19  
20  
21  
22  
23  
24  
25  
26  
27  
28  
29  
30  
31  
32  
33  
34  
35  
36  
37  
38  
39  
40  
41  
42  
43  
44  
45  
46  
47  
48  
49  
50  
51  
52  
53  
54  
55  
56  
57  
58  
59  
60
- Limitations of this IPD meta-analysis include the potential difficulty in acquiring the IPD and the heterogeneity of the study designs, study population and parasite population. A risk of bias analysis will be conducted to address the impact of potential unshared data.

For peer review only

## 67 Introduction

68 About 60% of all pregnancies are estimated to take place in malaria endemic areas.<sup>1</sup> In  
69 addition, pregnant women are amongst the most vulnerable groups for malaria infection leading  
70 to higher morbidity and mortality of both mothers and fetuses.<sup>2</sup> Although around 1500 studies on  
71 the efficacy of antimalarials in malaria treatment have been conducted, pregnant women have been  
72 excluded from the majority of clinical trials in the past, mainly because of safety concerns for the  
73 fetus.

74 Due to the lack of evidence for both efficacy and safety, quinine, rather than artemisinin-  
75 based combination therapy (ACT), has been recommended as the first-line treatment of  
76 uncomplicated *Plasmodium falciparum* malaria for pregnant women in the first trimester by the  
77 World Health Organization (WHO).<sup>3</sup> However, recent studies measuring the safety of artemisinin  
78 derivatives during pregnancy, including in the first trimester, have shown reassuring results<sup>4-7</sup> and  
79 it is likely that ACT will be recommended as the first-line treatment option for pregnant women  
80 regardless of the trimester in the next WHO guideline.<sup>8</sup> Nevertheless, the bulk of evidence is  
81 limited.

82 The efficacy and safety of antimalarials in pregnancy can be different from the results from  
83 the non-pregnant populations because of altered immunity, physiological change in  
84 pharmacokinetics and sequestration of parasites to placenta. Besides, the risk factors of treatment  
85 failure in pregnancy need to be assessed to improve the clinical care in pregnancy. However, there  
86 are no agreed guidelines on how to assess the efficacy in pregnancy while it is standardised in the  
87 non-pregnant patients by WHO.<sup>9</sup> This lack of standard methodology makes it challenging to  
88 conduct efficacy studies in pregnancy and leads to the variability of assessing and reporting the

1  
2  
3 89 outcomes.<sup>10,11</sup> Taken together, the current situation limits conducting aggregated data meta-  
4  
5 90 analyses.<sup>11</sup>  
6  
7

8 91 The WorldWide Antimalarial Resistance Network (WWARN) has established a unique  
9  
10 92 individual participant data (IPD)-sharing platform facilitating large-scale pooled meta-analyses.  
11  
12 93 We plan to include both published and unpublished studies exploring the efficacy and safety of  
13  
14 94 the treatment of malaria during pregnancy. We will conduct a one-stage IPD meta-analysis on the  
15  
16 95 currently recommended antimalarial drugs, i.e. artemisinin-based and quinine-based treatments,  
17  
18 96 used for the treatment of uncomplicated falciparum malaria in pregnancy.  
19  
20  
21  
22  
23

## 24 97 Objectives

25  
26  
27 98 The aim of this study is to evaluate and compare treatment outcomes of artemisinin-based  
28  
29 99 and quinine-based treatment for uncomplicated falciparum malaria in pregnancy.  
30  
31

32  
33 100 Primary objectives are:

- 34  
35 101 • To compare antimalarial efficacies among artemisinin-based and quinine-based  
36  
37 102 treatments  
38  
39  
40 103 • To identify risk factors associated with treatment failure  
41  
42  
43 104 • To assess the relationship between the dosing (dose per body weight) of  
44  
45 105 artemisinin-based treatments and treatment efficacy  
46  
47  
48

49 106 Secondary objectives are:

- 50  
51  
52 107 • To evaluate the risk of gametocyte carriage following antimalarial treatment  
53  
54  
55 108 • To evaluate the risk of adverse events following antimalarial treatment  
56  
57  
58  
59  
60



- 1  
2  
3 109 • To evaluate the risk of *Plasmodium vivax* infection following antimalarial treatment  
4  
5  
6

7  
8 110 **Methods and analyses**  
9

10  
11  
12 111 *Criteria for study eligibility*  
13

14  
15 112 **Types of studies**  
16

- 17 113 • Prospective clinical efficacy studies with a minimum 28-day active follow-up  
18  
19  
20 114 • Both interventional and observational cohort studies regardless of the number of  
21  
22 115 treatment arms (i.e. comparative or single-arm)  
23  
24  
25 116 • Genotyping conducted for distinguishing recrudescence and reinfection  
26  
27

28 117 The following studies will be excluded.  
29

- 30  
31 118 • ≤ 10 eligible pregnant women  
32  
33  
34 119 • conducted in non-endemic countries (i.e. returned travellers)  
35  
36

37 120 **Types of participants**  
38

- 39  
40 121 • Pregnant women in any trimester  
41  
42  
43 122 • Parasitologically confirmed *P. falciparum* parasitaemia  
44  
45  
46 123 • either asymptomatic or symptomatic  
47  
48

49 124 **Types of intervention/exposure and controls**  
50

- 51 125 • Treated with artemisinin-based or quinine-based treatments  
52  
53  
54  
55  
56  
57  
58  
59  
60

## 126 **Types of outcomes**

- 127 • Parasitological and clinical efficacy
- 128 • Adverse events

## 129 *Information sources and search strategy*

130 A systematic literature review was conducted to identify the potential studies to be included  
131 in this IPD meta-analysis. Seven databases (MEDLINE, Embase, Global Health, Cochrane Library,  
132 Scopus, Web of Science and LILACS) and two clinical trial registries (ICTRP and  
133 ClinicalTrial.gov) were used. Both published and unpublished grey literatures such as conference  
134 abstracts and registered trials were included. This systematic review and IPD meta-analysis is  
135 registered to PROSPERO (CRD42018104013), and the search terms and conditions are available  
136 there.

137 Briefly, the search combined five components: malaria; pregnancy; treatment or names of  
138 anti-malarial drugs; study design (interventional or observational cohort studies); and outcome  
139 types (efficacy) without limitation on publication year or language. The result of the literature  
140 search was published elsewhere.<sup>11</sup> The initial search was conducted on 9 July 2016, and had been  
141 updated until 5 July 2018 using PubMed and ICTRP. The IPD meta-analysis will be based on the  
142 studies identified by the final updated search.

## 143 *Data acquisition and data management*

### 144 **Collecting IPD**

145 Principal investigators of the published and unpublished studies identified by the  
146 systematic literature review will be invited to share their IPD with WWARN. Emails will be sent

1  
2  
3 147 to the corresponding authors on at least three occasions asking whether they are willing to join the  
4  
5 148 study group. A secure web-based platform has been developed by WWARN, and IPD will be  
6  
7  
8 149 uploaded after agreeing to the terms and conditions of the submission.<sup>12</sup> Data are fully anonymised  
9  
10 150 and handled in compliance with the UK Data Protection Act to protect personal information and  
11  
12 151 patient privacy. Original data are stored on a secure server hosted by the University of Oxford.

### 152 **Data management**

153 Raw data will be curated in a standardised format using the WWARN Clinical Module data  
154 management plan to facilitate pooled IPD meta-analyses.<sup>13</sup> After checking the raw data, any  
155 queries on the availability of data, ambiguity of the variables or potential errors will be solved by  
156 asking the data contributors. The protocol of the original studies will be sought from the data  
157 contributors or from the publication when available. The standardised dataset is made traceable to  
158 the raw data by use of a unique person (or episode) ID and study ID. This standardised dataset will  
159 be used for the analyses.

### 160 *Statistical analysis plan*

#### 161 **Study populations**

162 Pregnant women will be eligible for the purpose of this analysis if they meet the following  
163 criteria:

- 164 • Confirmed pregnancy status on day 0 of the treatment
- 165 • Information on the type, date and dose of antimalarial drugs: artemisinin-based and  
166 quinine-based treatments will be included
- 167 • Baseline data on patient age and estimated gestational age (or trimester of pregnancy)

- 1  
2  
3 168           • Date of the last day of follow-up or length of follow-up  
4  
5

6 169           The following patients will be excluded:  
7  
8

- 9 170           • No or missing data on parasitological confirmation of *P. falciparum* infection at  
10  
11 171           enrolment  
12  
13  
14 172           • Presenting with severe malaria symptoms at enrolment as defined by WHO<sup>3</sup>, except  
15  
16 173           uncomplicated hyperparasitaemia  
17  
18  
19  
20 174           • Incomplete dose  
21  
22

### 23 175           **Outcomes** 24

25 176           The primary outcome will be the polymerase chain reaction (PCR)-corrected *P. falciparum*  
26  
27 177           recrudescence. Secondary outcomes will include PCR-corrected *P. falciparum* reinfection; PCR-  
28  
29 178           uncorrected *P. falciparum* recurrence; parasite clearance; gametocyte carriage during follow up;  
30  
31 179           *P. vivax* infection during follow-up; and adverse events that developed after drug administration  
32  
33  
34

35 180           Recurrences of *P. falciparum* will be distinguished by PCR into recrudescence (treatment  
36  
37 181           failure) and reinfection.<sup>14</sup> Indeterminate PCR will be regarded as being censored on the day of  
38  
39 182           recurrence in survival analyses for PCR-corrected outcomes. In studies where peripheral malaria  
40  
41 183           smears were examined regularly (e.g. every week), the time of parasite recurrence will be defined  
42  
43 184           as the time of the first positive parasite smear after the parasite clearance following the treatment.  
44  
45 185           For pregnant women with no recurrent parasitaemia recorded, the day of their last negative smear  
46  
47 186           will be regarded as their last visit and censoring time. In case of intermittent follow-up (e.g. missed  
48  
49 187           follow-ups), the following rules will be applied:  
50  
51  
52

- 53  
54 188           (i)       Blood smears will be assumed negative between the two negative observations  
55  
56  
57  
58  
59  
60

1  
2  
3 189 (ii) If patient came back to be followed up with a positive smear, the date of positive  
4  
5 190 parasitaemia will be assumed to be the date of observation if this date is within 31 days from the  
6  
7  
8 191 last observation  
9

10  
11 192 (iii) If parasite clearance is not recorded after treatment but the positive parasite count  
12  
13 193 is recorded at least 7 days after starting the treatment, day of the first positive count will be treated  
14  
15 194 as day of recurrence  
16  
17

18 195 Definitions of status and other censorship are detailed in the Clinical Module DMSAP<sup>13</sup>  
19  
20 196 except the above modification. Early late treatment failure is not applied for quinine-based  
21  
22 197 treatment because quinine is given for 7 days.  
23  
24  
25

26 198 Adverse symptoms will include: abdominal pain, dizziness, headache, body pain/myalgia,  
27  
28 199 weakness/fatigue, vomiting, nausea, anorexia and tinnitus if data permit.  
29  
30

### 31 200 **Variables and their definitions**

32

33 201 The following baseline characteristics of patients will be included as appropriate if enough  
34  
35 202 data will be shared: age; estimated gestational age (or trimester); parity or gravidity; weight  
36  
37 203 (weight before pregnancy and weight at treatment); body mass index (BMI); baseline parasitaemia;  
38  
39 204 presence of fever (body temperature > 37.5 degrees Celsius); haemoglobin (or haematocrit);  
40  
41 205 anaemia (Hb < 11 g/dL or Hct < 30% for anaemia and Hb < 7 g/dL or Hct < 20% for severe  
42  
43 206 anaemia);<sup>15</sup> gametocytes on presentation; past history of malaria (time from the last treatment or  
44  
45 207 the number of past infection in the same pregnancy); description of infection (mixed species  
46  
47 208 infections); total mg/kg dose for each drug component; and supervision of drug administration.  
48  
49  
50 209 The doses of drugs received will be calculated from the number of tablets administered to each  
51  
52  
53  
54  
55  
56  
57  
58  
59  
60

1  
2  
3 210 patient. If the actual number of tablets received was not recorded, doses according to the protocol  
4  
5 211 will be used.  
6  
7

8 212 For each study, study locations and local transmission intensity will be considered. The  
9  
10 213 study sites will be classified into three categories: low, medium and high malaria transmission  
11  
12 214 based on the parasite prevalence estimates obtained from the Malaria Atlas Project for specific  
13  
14 215 location and year of study.<sup>16,17</sup>  
15  
16  
17

18 216 *P. vivax* intercalated infection will be regarded as censored if the original study did not test  
19  
20 217 PCR for falciparum recurrences after intercalated vivax infection. If the original study tested PCR  
21  
22 218 for falciparum recurrences regardless of intercalated vivax infection, vivax infection will be  
23  
24 219 regarded as a time-dependent covariate.  
25  
26  
27

## 28 220 **Descriptive summaries**

29  
30 221 A summary of the studies and baseline characteristics of the patients included in the  
31  
32 222 analysis will be presented. The number of available patients will be summarised for all variables  
33  
34 223 listed above, proportion will be used for categorical or binary variables, and mean and standard  
35  
36 224 deviation (or median and range) will be used for continuous variables.  
37  
38  
39

40 225 PCR-corrected and uncorrected outcomes will be used to compute the Kaplan-Meier (K-  
41  
42 226 M) estimates. The K-M estimates will be presented graphically together with the number of  
43  
44 227 pregnant women in the risk set. Log rank test will be used for assessing the overall K-M profiles  
45  
46 228 between treatment groups. The efficacy between treatments will be compared at fixed time points  
47  
48 229 (i.e. on day 28, 42, and 63) by constructing a chi-squared test statistics using the stratified (by  
49  
50 230 study sites) approach.<sup>18</sup>  
51  
52  
53  
54  
55  
56  
57  
58  
59  
60

### 231 **Analysis of primary outcome**

232 A one-stage IPD meta-analysis using Cox model with shared frailty will be conducted to  
233 identify the risk factors of treatment failure as well as comparing different treatments. Study sites  
234 will be fitted as random effects. For repeated episodes, multi-level mixed effects model (if there  
235 are enough data) or the previous history of malaria will be used. If data permit, non-linear  
236 relationship will be examined for continuous variables.<sup>19</sup> Cox-Snell and Schoenfeld residuals will  
237 be examined to determine the appropriateness of model fit and proportional hazard assumption,  
238 respectively. Alternative statistical approaches such as flexible parametric models or introducing  
239 an interaction with time will be considered if the proportionality assumption is not satisfied.

### 240 **Analyses of secondary outcomes**

241 Analysis of secondary outcomes will be carried out provided enough data is present; else,  
242 only summary statistics will be reported. Analyses similar to the primary outcome will be  
243 conducted for *P. falciparum* reinfection, *P. falciparum* recurrence and *P. vivax* infection.

244 Parasite clearance will be assessed as the proportions of patients cleared asexual falciparum  
245 parasitaemia on day 1, 2 and 3. Univariable and multivariable mixed effect logistic regression  
246 models (or Cox models for the time to parasite clearance) will be used to identify the risk factors  
247 associated with parasite positivity status.

248 Gametocyte carriage will be assessed as the proportion of patients with *P. falciparum*  
249 gametocytes on day 0, 3, 7, 14 or 21. Proportions after day 0 will be stratified by the presence of  
250 gametocytes at baseline. If enough data is available, mixed effects logistic regression models will  
251 be used to assess the risk factors for gametocytes carriage on day 0 and after treatment stratified  
252 by the presence of gametocytes at baseline.

1  
2  
3 253 Adverse symptoms will be assessed as the proportion of patients who developed adverse  
4  
5 254 symptoms after the treatment initiation. Proportions of patients who developed symptoms after  
6  
7  
8 255 day 0 will be stratified by whether or not that symptom was present before the treatment initiation.  
9  
10 256 If enough data are available, mixed effects logistic regression models will be used to assess the  
11  
12 257 risk factors of adverse symptoms developed after the treatment initiation. Symptoms on day 0  
13  
14 258 (before treatment) will be added as a covariate. Primarily the symptoms developed in the first week  
15  
16 259 will be included. Symptoms developed at any time during the study period may be added.  
17  
18  
19 260 Pregnancy outcomes may be assessed if enough data will be gathered.  
20  
21

### 22 261 **Variable selection**

23  
24 262 For any regression models, the following strategy recommended by Collet<sup>20</sup> will be used  
25  
26  
27 263 to determine independent risk factors. Initially all possible risk factors will be examined in the  
28  
29 264 univariable model to assess if any of the variables are related to the treatment outcome. All  
30  
31 265 significant variables with a p-value  $\leq 0.05$  will then be added to the baseline model. The variables  
32  
33 266 with p-value of  $> 0.05$  will be excluded from the baseline model one by one starting from the  
34  
35  
36 267 variable with the largest p-value. Once only significant covariates remained in the model, all  
37  
38 268 excluded variables will be added to this model one by one to check whether there are any variables  
39  
40  
41 269 that become significant in the presence of other risk factors. Likelihood Ratio Test (LRT) and  
42  
43 270 Akaike's Information Criterion (AIC) will be used to compare nested and non-nested models,  
44  
45 271 respectively. Treatment and baseline parasitaemia will be included in the multivariable models as  
46  
47 272 *a priori* forced variables regardless of the statistical significance. Variables that are missing more  
48  
49 273 than 50% will not be included in multivariable analyses.<sup>21</sup> Interaction between gravidity (parity)  
50  
51 274 and endemicity will be assessed, as the impact of gravidity (i.e. pregnancy-specific immunity) can  
52  
53  
54 275 be different depending on the endemicity.  
55  
56  
57  
58  
59  
60



### 276 **Assessment of statistical heterogeneity across studies**

277 The multilevel logistic or Cox models would be used for explaining the study-site  
278 heterogeneity. Heterogeneity across study sites will be statistically assessed as the variance of the  
279 shared frailty term estimated in the random effect Cox model or variance of the random intercepts  
280 in logistic regression. Additionally, intra-class correlation in logistic regression model will be  
281 reported.

### 282 **Subgroup analyses**

283 Analyses will be conducted by geographical regions and by treatment (for assessing dose  
284 impact of each drug) if data permit.

### 285 **Sensitivity analyses**

286 Three types of sensitivity analyses will be performed. Firstly, a model will be refitted  
287 excluding non-RCTs to assess whether the baseline imbalance due to observational cohort studies  
288 or single-arm interventional studies will influence the results. Secondly, a model will be refitted  
289 with excluding one study at a time to identify any influential studies. Thirdly, to assess the impact  
290 of covariates with missing values, multiple imputation may be used.<sup>21</sup>

### 291 **Strength of the body of evidence / risk of bias across studies**

292 The risk of bias within and across the included studies will be assessed following the  
293 GRADE guideline.<sup>22</sup> Publication bias will be evaluated by a funnel plot of the log-transformed  
294 hazards ratio (odds ratio or proportion),<sup>23</sup> if more than 10 studies will be included.<sup>24</sup> Despite the  
295 effort, all the studies identified in the systematic review may not be shared and included in this  
296 IPD meta-analysis. The bias by the studies that are unable to be included in the analyses will be  
297 evaluated as a sensitivity analysis.<sup>25</sup> The reported aggregated efficacy will be extracted from the  
298 publication and a two-stage meta-analysis combining shared and unshared data will be attempted.<sup>26</sup>

### 299 **Further development of statistical analysis plan**

300 The main analysis is planned as described above. Modification or additional analyses may  
301 be required as the data collection progresses. Updated statistical analysis plans will be available at  
302 the WWARN website.<sup>27</sup>

### 303 **Software**

304 Statistical analysis will be conducted using R (The R Foundation for Statistical Computing)  
305 or STATA (College Station, Texas, USA).

### 306 **Ethics and dissemination**

307 This IPD meta-analysis met the criteria for waiver of ethical review as defined by the  
308 Oxford Tropical Research Ethics Committee (OxTREC) as the research consists of secondary  
309 analysis of existing anonymous data.<sup>28</sup> All studies included in this analysis will have received local  
310 ethical approvals and our pooled IPD meta-analysis will be addressing scientific questions that are  
311 very similar to the original research questions.

312 Findings will be reported following the PRISMA-IPD guideline<sup>29</sup> at peer-reviewed  
313 journals with open access. The progress will be updated on our study group website.<sup>27</sup> This  
314 protocol is reported following PRISMA-P guideline<sup>30,31</sup> and the systematic literature review and  
315 IPD meta-analysis is registered to PROSPERO (CRD42018104013). Any publications based on  
316 the findings of this IPD meta-analysis will be in accordance with the guidelines of the International  
317 Committee of Medical Journal Editors.

## 318 Discussion

319 This IPD meta-analysis will update the previous aggregated data meta-analyses that  
320 included only four or five RCTs,<sup>11,32</sup> by incorporating the IPD from single-arm interventional or  
321 observational cohort studies. As the data can be standardised and analysed in a uniform way, IPD  
322 meta-analyses are particularly useful when there is no standard study design such as in this case.  
323 Risk factors associated with treatment failures particularly the dosing of the currently used  
324 treatments can be assessed in IPD meta-analyses, but rarely in aggregated data meta-analyses.  
325 Although meta-analyses of secondary data cannot include variables that were not assessed in the  
326 original studies, the results of this IPD meta-analysis can identify the pregnant women in need of  
327 close clinical monitoring based on what is commonly assessed. Despite the increased time and  
328 effort of gathering and standardising the IPD, the advantages of IPD meta-analysis outweigh  
329 particularly for answering research questions on these neglected minority populations.

330 WWARN has developed the secure and equitable data platform and the international  
331 collaborative network of malaria researchers worldwide over the last decade. With this unique  
332 collaborative effort, we hope that these findings will lead to the improvement of clinical  
333 management of this vulnerable but neglected population.

## 334 Author Contributions

335 MS, RoM and PG conceived the idea. MS and RM drafted the manuscript. KK, FN, RoM,  
336 PG and KS critically revised the manuscript. All authors have read and approved the final  
337 manuscript.

## 338 Funding

339 The WorldWide Antimalarial Resistance Network (WWARN) is funded by Bill and  
340 Melinda Gates Foundation. SMRU is part of the Mahidol Oxford University Research Unit  
341 supported by the Wellcome Trust of Great Britain. MS is supported by the University of Oxford  
342 Clarendon Fund. The funders did not participate in the study development, the writing of the paper,  
343 decision to publish, or preparation of the manuscript.

## 344 Competing interests

345 None declared.

## 346 Ethics approval

347 This individual patient data meta-analysis met the criteria for waiver of ethical review as  
348 defined by the Oxford Tropical Research Ethics Committee (OxTREC) since the research consists  
349 of secondary analysis of existing anonymous data. Each study included in the analysis will have  
350 received local ethics approvals.

## 351 Acknowledgement

352 We would like to thank Dr Mary Ellen Gilder for her contribution to the previous systematic  
353 literature review.

## 354 References

- 355 1. Dellicour S, Tatem AJ, Guerra CA, et al. Quantifying the number of pregnancies at risk of  
356 malaria in 2007: a demographic study. *PLoS Med* 2010;7(1):e1000221.

- 1  
2  
3 357 2. Rogerson SJ, Desai M, Mayor A, et al. Burden, pathology, and costs of malaria in pregnancy:  
4 358 new developments for an old problem. *Lancet Infect Dis* 2018;18(4):e107-e18.
- 5 359 3. WHO. Guidelines for the treatment of malaria. Third edition. Geneva: World Health  
6 360 Organization 2015.
- 7 361 4. Dellicour S, Sevene E, McGready R, et al. First-trimester artemisinin derivatives and quinine  
8 362 treatments and the risk of adverse pregnancy outcomes in Africa and Asia: A meta-analysis  
9 363 of observational studies. *PLoS Med* 2017;14(5):e1002290.
- 10 364 5. Kovacs SD, van Eijk AM, Sevene E, et al. The Safety of Artemisinin Derivatives for the  
11 365 Treatment of Malaria in the 2nd or 3rd Trimester of Pregnancy: A Systematic Review and  
12 366 Meta-Analysis. *PLoS One* 2016;11(11):e0164963.
- 13 367 6. McGready R, Lee SJ, Wiladphaingern J, et al. Adverse effects of falciparum and vivax malaria  
14 368 and the safety of antimalarial treatment in early pregnancy: a population-based study.  
15 369 *Lancet Infect Dis* 2012;12(5):388-96.
- 16 370 7. Moore KA, Simpson JA, Paw MK, et al. Safety of artemisinins in first trimester of prospectively  
17 371 followed pregnancies: an observational study. *Lancet Infect Dis* 2016;16(5):576-83.
- 18 372 8. WHO Malaria Policy Advisory Committee Secretariat. Malaria Policy Advisory Committee to  
19 373 the WHO: conclusions and recommendations of eighth biannual meeting (September 2015).  
20 374 *Malar J* 2016;15:117.
- 21 375 9. World Health Organization. Methods for surveillance of antimalarial drug efficacy. Geneva:  
22 376 World Health Organization 2009.
- 23 377 10. Saito M, Gilder ME, Nosten F, et al. Methodology of assessment and reporting of safety in  
24 378 anti-malarial treatment efficacy studies of uncomplicated falciparum malaria in pregnancy:  
25 379 a systematic literature review. *Malar J* 2017;16:491.
- 26 380 11. Saito M, Gilder ME, Nosten F, et al. Systematic literature review and meta-analysis of the  
27 381 efficacy of artemisinin-based and quinine-based treatments for uncomplicated falciparum  
28 382 malaria in pregnancy: methodological challenges. *Malar J* 2017;16:488.
- 29 383 12. WorldWide Antimalarial Resistance Network (WWARN). Terms of Submission 2017 [cited  
30 384 5 July 2018]. Available from: <http://www.wwarn.org/tools-resources/terms-submission>.
- 31 385 13. WorldWide Antimalarial Resistance Network (WWARN). Clinical Module: Data  
32 386 Management and Statistical Analysis Plan Version 1.2. 2012 [cited 5 July 2018]. Available  
33 387 from: <http://www.wwarn.org/sites/default/files/ClinicalDMSAP.pdf>.
- 34 388 14. World Health Organization. Methods and techniques for clinical trials on antimalarial drug  
35 389 efficacy: Genotyping to identify parasite populations. Geneva: World Health Organization  
36 390 2008.
- 37 391 15. World Health Organization. Haemoglobin concentrations for the diagnosis of anaemia and  
38 392 assessment of severity. Geneva: World Health Organization 2011.
- 39 393 16. Bhatt S, Weiss DJ, Cameron E, et al. The effect of malaria control on Plasmodium falciparum  
40 394 in Africa between 2000 and 2015. *Nature* 2015;526(7572):207-11.
- 41 395 17. Gething PW, Patil AP, Smith DL, et al. A new world malaria map: Plasmodium falciparum  
42 396 endemicity in 2010. *Malar J* 2011;10:378.
- 43 397 18. Klein JP, Logan B, Harhoff M, et al. Analyzing survival curves at a fixed point in time. *Stat*  
44 398 *Med* 2007;26(24):4505-19.
- 45 399 19. Royston P, Sauerbrei W. Fractional Polynomials for One Variable. Multivariable Model-  
46 400 building: A pragmatic approach to regression analysis based on fractional polynomials for  
47 401 modelling continuous variables. Chuchester: John Wiley & Sons 2008:71-98.

- 1  
2  
3 402 20. Collett D. 3.6 Strategy for model selection. *Modelling survival data in medical research* Third  
4 403 edition. New York: CRC Press 2015:83-90.
- 5 404 21. White IR, Royston P, Wood AM. Multiple imputation using chained equations: Issues and  
6 405 guidance for practice. *Stat Med* 2011;30(4):377-99.
- 7 406 22. Guyatt G, Oxman AD, Akl EA, et al. GRADE guidelines: 1. Introduction—GRADE evidence  
8 407 profiles and summary of findings tables. *J Clin Epidemiol* 2011;64(4):383-94.
- 9 408 23. Silcocks P. Hazard ratio funnel plots for survival comparisons. *J Epidemiol Community Health*  
10 409 2009;63(10):856-61.
- 11 410 24. Sterne JA, Sutton AJ, Ioannidis JP, et al. Recommendations for examining and interpreting  
12 411 funnel plot asymmetry in meta-analyses of randomised controlled trials. *BMJ*  
13 412 2011;343:d4002.
- 14 413 25. Ahmed I, Sutton AJ, Riley RD. Assessment of publication bias, selection bias, and unavailable  
15 414 data in meta-analyses using individual participant data: a database survey. *BMJ* 2012;344
- 16 415 26. Riley RD, Lambert PC, Abo-Zaid G. Meta-analysis of individual participant data: rationale,  
17 416 conduct, and reporting. *BMJ* 2010;340:c221.
- 18 417 27. WorldWide Antimalarial Resistance Network (WWARN). Malaria in pregnancy treatment  
19 418 efficacy study group 2016 [cited 5 July 2018]. Available from:  
20 419 <http://www.wwarn.org/working-together/study-groups/malaria-pregnancy-treatment->  
21 420 [efficacy-study-group](http://www.wwarn.org/working-together/study-groups/malaria-pregnancy-treatment-).
- 22 421 28. Oxford Tropical Research Ethics Committee. 2018 [cited 23 October 2018]. Available from:  
23 422 <https://researchsupport.admin.ox.ac.uk/governance/ethics/committees/ox trec>.
- 24 423 29. Stewart LA, Clarke M, Rovers M, et al. Preferred Reporting Items for Systematic Review and  
25 424 Meta-Analyses of individual participant data: the PRISMA-IPD Statement. *JAMA*  
26 425 2015;313(16):1657-65.
- 27 426 30. Shamseer L, Moher D, Clarke M, et al. Preferred reporting items for systematic review and  
28 427 meta-analysis protocols (PRISMA-P) 2015: elaboration and explanation. *BMJ* 2015;349
- 29 428 31. Moher D, Shamseer L, Clarke M, et al. Preferred reporting items for systematic review and  
30 429 meta-analysis protocols (PRISMA-P) 2015 statement. *Systematic Reviews* 2015;4(1):1.
- 31 430 32. Burger RJ, van Eijk AM, Bussink M, et al. Artemisinin-based combination therapy versus  
32 431 quinine or other combinations for treatment of uncomplicated *Plasmodium falciparum*  
33 432 malaria in the second and third trimester of pregnancy: a systematic review and meta-  
34 433 analysis. *Open Forum Infect Dis* 2016;3(1):ofv170.
- 35  
36  
37  
38  
39  
40  
41 434  
42  
43  
44  
45  
46  
47  
48  
49  
50  
51  
52  
53  
54  
55  
56  
57  
58  
59  
60

## PRISMA-P 2015 Checklist

This checklist has been adapted for use with protocol submissions to *Systematic Reviews* from Table 3 in Moher D et al: Preferred reporting items for systematic review and meta-analysis protocols (PRISMA-P) 2015 statement. *Systematic Reviews* 2015 4:1

| Section/topic                     | #  | Checklist item                                                                                                                                                                                  | Information reported                |                          | Line number(s) |
|-----------------------------------|----|-------------------------------------------------------------------------------------------------------------------------------------------------------------------------------------------------|-------------------------------------|--------------------------|----------------|
|                                   |    |                                                                                                                                                                                                 | Yes                                 | No                       |                |
| <b>ADMINISTRATIVE INFORMATION</b> |    |                                                                                                                                                                                                 |                                     |                          |                |
| <b>Title</b>                      |    |                                                                                                                                                                                                 |                                     |                          |                |
| Identification                    | 1a | Identify the report as a protocol of a systematic review                                                                                                                                        | <input checked="" type="checkbox"/> | <input type="checkbox"/> | 2-3            |
| Update                            | 1b | If the protocol is for an update of a previous systematic review, identify as such                                                                                                              | <input type="checkbox"/>            | <input type="checkbox"/> | NA             |
| <b>Registration</b>               | 2  | If registered, provide the name of the registry (e.g., PROSPERO) and registration number in the Abstract                                                                                        | <input checked="" type="checkbox"/> | <input type="checkbox"/> | 53             |
| <b>Authors</b>                    |    |                                                                                                                                                                                                 |                                     |                          |                |
| Contact                           | 3a | Provide name, institutional affiliation, and e-mail address of all protocol authors; provide physical mailing address of corresponding author                                                   | <input checked="" type="checkbox"/> | <input type="checkbox"/> | 5-20           |
| Contributions                     | 3b | Describe contributions of protocol authors and identify the guarantor of the review                                                                                                             | <input checked="" type="checkbox"/> | <input type="checkbox"/> | 346-349        |
| <b>Amendments</b>                 | 4  | If the protocol represents an amendment of a previously completed or published protocol, identify as such and list changes; otherwise, state plan for documenting important protocol amendments | <input type="checkbox"/>            | <input type="checkbox"/> | NA             |
| <b>Support</b>                    |    |                                                                                                                                                                                                 |                                     |                          |                |
| Sources                           | 5a | Indicate sources of financial or other support for the review                                                                                                                                   | <input checked="" type="checkbox"/> | <input type="checkbox"/> | 350-355        |
| Sponsor                           | 5b | Provide name for the review funder and/or sponsor                                                                                                                                               | <input checked="" type="checkbox"/> | <input type="checkbox"/> | 350-355        |
| Role of sponsor/funder            | 5c | Describe roles of funder(s), sponsor(s), and/or institution(s), if any, in developing the protocol                                                                                              | <input checked="" type="checkbox"/> | <input type="checkbox"/> | 350-355        |
| <b>INTRODUCTION</b>               |    |                                                                                                                                                                                                 |                                     |                          |                |
| <b>Rationale</b>                  | 6  | Describe the rationale for the review in the context of what is already known                                                                                                                   | <input checked="" type="checkbox"/> | <input type="checkbox"/> | 78-94          |
| <b>Objectives</b>                 | 7  | Provide an explicit statement of the question(s) the review will address with reference to participants, interventions, comparators, and outcomes (PICO)                                        | <input checked="" type="checkbox"/> | <input type="checkbox"/> | 95-114         |



| Section/topic                             | #   | Checklist item                                                                                                                                                                                                                              | Information reported |                          | Line number(s) |
|-------------------------------------------|-----|---------------------------------------------------------------------------------------------------------------------------------------------------------------------------------------------------------------------------------------------|----------------------|--------------------------|----------------|
|                                           |     |                                                                                                                                                                                                                                             | Yes                  | No                       |                |
| <b>METHODS</b>                            |     |                                                                                                                                                                                                                                             |                      |                          |                |
| <b>Eligibility criteria</b>               | 8   | Specify the study characteristics (e.g., PICO, study design, setting, time frame) and report characteristics (e.g., years considered, language, publication status) to be used as criteria for eligibility for the review                   | ✓                    | <input type="checkbox"/> | 116-133        |
| <b>Information sources</b>                | 9   | Describe all intended information sources (e.g., electronic databases, contact with study authors, trial registers, or other grey literature sources) with planned dates of coverage                                                        | ✓                    | <input type="checkbox"/> | 135-141        |
| <b>Search strategy</b>                    | 10  | Present draft of search strategy to be used for at least one electronic database, including planned limits, such that it could be repeated                                                                                                  | ✓                    | <input type="checkbox"/> | 135-147        |
| <b>STUDY RECORDS</b>                      |     |                                                                                                                                                                                                                                             |                      |                          |                |
| Data management                           | 11a | Describe the mechanism(s) that will be used to manage records and data throughout the review                                                                                                                                                | ✓                    | <input type="checkbox"/> | 158-165        |
| Selection process                         | 11b | State the process that will be used for selecting studies (e.g., two independent reviewers) through each phase of the review (i.e., screening, eligibility, and inclusion in meta-analysis)                                                 | ✓                    | <input type="checkbox"/> | 134-157        |
| Data collection process                   | 11c | Describe planned method of extracting data from reports (e.g., piloting forms, done independently, in duplicate), any processes for obtaining and confirming data from investigators                                                        | ✓                    | <input type="checkbox"/> | 149-165        |
| <b>Data items</b>                         | 12  | List and define all variables for which data will be sought (e.g., PICO items, funding sources), any pre-planned data assumptions and simplifications                                                                                       | ✓                    | <input type="checkbox"/> | 209-228        |
| <b>Outcomes and prioritization</b>        | 13  | List and define all outcomes for which data will be sought, including prioritization of main and additional outcomes, with rationale                                                                                                        | ✓                    | <input type="checkbox"/> | 182-208        |
| <b>Risk of bias in individual studies</b> | 14  | Describe anticipated methods for assessing risk of bias of individual studies, including whether this will be done at the outcome or study level, or both; state how this information will be used in data synthesis                        | ✓                    | <input type="checkbox"/> | 295-309        |
| <b>DATA</b>                               |     |                                                                                                                                                                                                                                             |                      |                          |                |
| <b>Synthesis</b>                          | 15a | Describe criteria under which study data will be quantitatively synthesized                                                                                                                                                                 | ✓                    | <input type="checkbox"/> | 182-228        |
|                                           | 15b | If data are appropriate for quantitative synthesis, describe planned summary measures, methods of handling data, and methods of combining data from studies, including any planned exploration of consistency (e.g., $I^2$ , Kendall's tau) | ✓                    | <input type="checkbox"/> | 229-291        |
|                                           | 15c | Describe any proposed additional analyses (e.g., sensitivity or subgroup analyses, meta-regression)                                                                                                                                         | ✓                    | <input type="checkbox"/> | 292-300        |
|                                           | 15d | If quantitative synthesis is not appropriate, describe the type of summary planned                                                                                                                                                          | ✓                    | <input type="checkbox"/> | 307-309        |



1  
2  
3  
4  
5  
6  
7  
8  
9  
10  
11  
12  
13  
14  
15  
16  
17  
18  
19  
20  
21  
22  
23  
24  
25  
26  
27  
28  
29  
30  
31  
32  
33  
34  
35  
36  
37  
38  
39  
40  
41  
42  
43  
44  
45  
46

| Section/topic                     | #  | Checklist item                                                                                                              | Information reported                |                          | Line number(s) |
|-----------------------------------|----|-----------------------------------------------------------------------------------------------------------------------------|-------------------------------------|--------------------------|----------------|
|                                   |    |                                                                                                                             | Yes                                 | No                       |                |
| Meta-bias(es)                     | 16 | Specify any planned assessment of meta-bias(es) (e.g., publication bias across studies, selective reporting within studies) | <input checked="" type="checkbox"/> | <input type="checkbox"/> | 301-309        |
| Confidence in cumulative evidence | 17 | Describe how the strength of the body of evidence will be assessed (e.g., GRADE)                                            | <input checked="" type="checkbox"/> | <input type="checkbox"/> | 302-303        |

For peer review only

# BMJ Open

## The efficacy of artemisinin-based and quinine-based treatments for uncomplicated falciparum malaria in pregnancy: a protocol for systematic review and individual patient data (IPD) meta-analysis

|                                 |                                                                                                                                                                                                                                                                                                                                                                                                                                                                                                                                                                                                                                                                                                                                                                                                                                                                                                                                                                                                                                                                                                                                                                                                                                                                                                                                                                                                                 |
|---------------------------------|-----------------------------------------------------------------------------------------------------------------------------------------------------------------------------------------------------------------------------------------------------------------------------------------------------------------------------------------------------------------------------------------------------------------------------------------------------------------------------------------------------------------------------------------------------------------------------------------------------------------------------------------------------------------------------------------------------------------------------------------------------------------------------------------------------------------------------------------------------------------------------------------------------------------------------------------------------------------------------------------------------------------------------------------------------------------------------------------------------------------------------------------------------------------------------------------------------------------------------------------------------------------------------------------------------------------------------------------------------------------------------------------------------------------|
| Journal:                        | <i>BMJ Open</i>                                                                                                                                                                                                                                                                                                                                                                                                                                                                                                                                                                                                                                                                                                                                                                                                                                                                                                                                                                                                                                                                                                                                                                                                                                                                                                                                                                                                 |
| Manuscript ID                   | bmjopen-2018-027503.R1                                                                                                                                                                                                                                                                                                                                                                                                                                                                                                                                                                                                                                                                                                                                                                                                                                                                                                                                                                                                                                                                                                                                                                                                                                                                                                                                                                                          |
| Article Type:                   | Protocol                                                                                                                                                                                                                                                                                                                                                                                                                                                                                                                                                                                                                                                                                                                                                                                                                                                                                                                                                                                                                                                                                                                                                                                                                                                                                                                                                                                                        |
| Date Submitted by the Author:   | 31-Mar-2019                                                                                                                                                                                                                                                                                                                                                                                                                                                                                                                                                                                                                                                                                                                                                                                                                                                                                                                                                                                                                                                                                                                                                                                                                                                                                                                                                                                                     |
| Complete List of Authors:       | Saito, Makoto; WorldWide Antimalarial Resistance Network (WWARN), ; University of Oxford, Centre for Tropical Disease and Global Health, Nuffield Department of Medicine<br>Mansoor, Rashid; WorldWide Antimalarial Resistance Network (WWARN); University of Oxford, Centre for Tropical Disease and Global Health, Nuffield Department of Medicine<br>Kennon, Kalynn; WorldWide Antimalarial Resistance Network (WWARN); University of Oxford, Centre for Tropical Disease and Global Health, Nuffield Department of Medicine<br>McGready, Rose; Shoklo Malaria Research Unit, Mahidol-Oxford Tropical Medicine Research Unit, Faculty of Tropical Medicine, Mahidol University; Centre for Tropical Medicine and Global Health, Nuffield Department of Medicine, University of Oxford<br>Nosten, François; Centre for Tropical Medicine and Global Health, Nuffield Department of Medicine, University of Oxford; Shoklo Malaria Research Unit, Mahidol-Oxford Tropical Medicine Research Unit, Faculty of Tropical Medicine, Mahidol University<br>Guerin, Philippe; WorldWide Antimalarial Resistance Network (WWARN); University of Oxford, Centre for Tropical Disease and Global Health, Nuffield Department of Medicine<br>Stepniewska, Kasia; WorldWide Antimalarial Resistance Network (WWARN); University of Oxford, Centre for Tropical Disease and Global Health, Nuffield Department of Medicine |
| <b>Primary Subject Heading</b>: | Infectious diseases                                                                                                                                                                                                                                                                                                                                                                                                                                                                                                                                                                                                                                                                                                                                                                                                                                                                                                                                                                                                                                                                                                                                                                                                                                                                                                                                                                                             |
| Secondary Subject Heading:      | Infectious diseases, Pharmacology and therapeutics                                                                                                                                                                                                                                                                                                                                                                                                                                                                                                                                                                                                                                                                                                                                                                                                                                                                                                                                                                                                                                                                                                                                                                                                                                                                                                                                                              |
| Keywords:                       | malaria, pregnancy, treatment efficacy, individual patient data meta-analysis, artemisinin, quinine                                                                                                                                                                                                                                                                                                                                                                                                                                                                                                                                                                                                                                                                                                                                                                                                                                                                                                                                                                                                                                                                                                                                                                                                                                                                                                             |
|                                 |                                                                                                                                                                                                                                                                                                                                                                                                                                                                                                                                                                                                                                                                                                                                                                                                                                                                                                                                                                                                                                                                                                                                                                                                                                                                                                                                                                                                                 |

SCHOLARONE™  
Manuscripts

1  
2  
3  
4  
5  
6  
7  
8  
9  
10  
11  
12  
13  
14  
15  
16  
17  
18  
19  
20  
21  
22  
23  
24  
25  
26  
27  
28  
29  
30  
31  
32  
33  
34  
35  
36  
37  
38  
39  
40  
41  
42  
43  
44  
45  
46  
47  
48  
49  
50  
51  
52  
53  
54  
55  
56  
57  
58  
59  
60

1 The efficacy of artemisinin-based and quinine-based treatments for uncomplicated  
2 falciparum malaria in pregnancy: a protocol for systematic review and individual patient data  
3 (IPD) meta-analysis

4  
5 Makoto Saito<sup>1,2,\*</sup>, Rashid Mansoor<sup>1,2</sup>, Kalynn Kennon<sup>1,2</sup>, Rose McGready<sup>2,3</sup>, François  
6 Nosten<sup>2,3</sup>, Philippe J Guérin<sup>1,2</sup>, Kasia Stepniewska<sup>1,2</sup>

7  
8 <sup>1</sup>WorldWide Antimalarial Resistance Network (WWARN), Oxford, UK

9 <sup>2</sup>Centre for Tropical Medicine and Global Health, Nuffield Department of Clinical  
10 Medicine, University of Oxford, Oxford, UK

11 <sup>3</sup>Shoklo Malaria Research Unit (SMRU), Mahidol-Oxford Tropical Medicine Research  
12 Unit, Faculty of Tropical Medicine, Mahidol University, Mae Sot, Tak, Thailand

13  
14 \* Corresponding to Makoto Saito

15 Address: Centre for Tropical Medicine and Global Health, NDM Research Building, Old Road  
16 Campus, Roosevelt Drive, Oxford, OX3 7FZ, UK

17 Tel: +44-01865 612900

18 E-mails: [makoto.saito@wwarn.org](mailto:makoto.saito@wwarn.org) (MS), [rashid.mansoor@wwarn.org](mailto:rashid.mansoor@wwarn.org) (RM),  
19 [kalynn.kennon@wwarn.org](mailto:kalynn.kennon@wwarn.org) (KK), [rose@shoklo-unit.com](mailto:rose@shoklo-unit.com) (RoM), [francois@tropmedres.ac](mailto:francois@tropmedres.ac)  
20 (FN), [philippe.guerin@wwarn.org](mailto:philippe.guerin@wwarn.org) (PG), [kasia.stepniewska@wwarn.org](mailto:kasia.stepniewska@wwarn.org) (KS)

21  
22 Word count: 2998

23 Key words: malaria, pregnancy, treatment efficacy, individual patient data meta-analysis,  
24 artemisinin, quinine

## 25 Abstract

### 26 *Introduction*

27 Pregnant women are more vulnerable to malaria leading to adverse impact on both  
28 mothers and fetuses. However, knowledge on the efficacy and safety of antimalarials in  
29 pregnancy is limited by the paucity of randomised control trials and the lack of standardised  
30 protocols in this special sub-population. Pooling individual patient data (IPD) for meta-analysis  
31 could address in part these limitations to summarise accurately the currently available evidence  
32 on treatment efficacy and risk factors of treatment failure.

### 33 *Methods and analysis*

34 To assess the treatment efficacy of artemisinin-based and quinine-based treatments for  
35 uncomplicated falciparum malaria in pregnancy, seven databases (MEDLINE, Embase, Global  
36 Health, Cochrane Library, Scopus, Web of Science and Literatura Latino Americana em  
37 Ciências da Saúde) and two clinical trial registries (International Clinical Trials Registry  
38 Platform and ClinicalTrial.gov) were searched. Both interventional and observational cohort  
39 studies following up for at least 28 days will be included. IPD of the identified eligible  
40 published or unpublished studies will be sought by inviting principal investigators. Raw IPD  
41 will be shared through the web-based secure platform developed by WorldWide Antimalarial  
42 Resistance Network using the established methodology. The primary objective is to compare  
43 the risk of polymerase chain reaction (PCR)-corrected treatment failure among different  
44 treatments and to find the risk factors. One-stage IPD meta-analysis by Cox model with shared  
45 frailty will be conducted. A risk of bias assessment will be conducted to address the impact of  
46 potential unshared data and of the quality of individual studies. Potential limitations include  
47 difficulty in acquiring the IPD and heterogeneity of the study designs due to the lack of standard.

## 48 *Ethics and Dissemination*

49 This IPD meta-analysis consists of secondary analyses of existing anonymous data and  
50 meets the criteria for waiver of ethical review by the Oxford Tropical Research Ethics  
51 Committee. The results of this IPD meta-analysis will be disseminated through open-access  
52 publications at peer-reviewed journals. The study results will lead to a better understanding of  
53 malaria treatment in pregnancy, which can be used for clinical decision-making and conducting  
54 further studies.

55 *PROSPERO registration number*: CRD42018104013.

## 56 Article Summary

### 57 *Strengths and limitations of this study*

- 58 • The research on the efficacy of antimalarials in pregnancy has been restricted by the  
59 paucity of randomised control trials and the lack of a standard study design for  
60 pregnancy.
- 61 • This study will be the first individual patient data (IPD) meta-analysis on the efficacy  
62 of currently recommended antimalarials in pregnancy incorporating IPD from both  
63 randomised control trials and single-arm cohort studies.
- 64 • IPD that are standardised in the same format and analysed in a uniform way with  
65 adjustment of covariates will allow us to compare the efficacy of different treatment as  
66 well as to find risk factors of treatment failure in this vulnerable but understudied  
67 population.
- 68 • The collection of IPD globally will ensure the generalisability of the results.

- 1  
2  
3 69 • Limitations of this IPD meta-analysis include the potential difficulty in acquiring the  
4  
5 70 IPD and the heterogeneity of the study designs, study population and parasite  
6  
7  
8 71 population. A risk of bias assessment will be conducted to address the impact of  
9  
10 72 potential unshared data and of the quality of individual studies.  
11  
12  
13  
14  
15  
16  
17  
18  
19  
20  
21  
22  
23  
24  
25  
26  
27  
28  
29  
30  
31  
32  
33  
34  
35  
36  
37  
38  
39  
40  
41  
42  
43  
44  
45  
46  
47  
48  
49  
50  
51  
52  
53  
54  
55  
56  
57  
58  
59  
60

For peer review only

## 73 Introduction

74 About 60% of all pregnancies are estimated to take place in malaria-endemic areas.<sup>1</sup> In  
75 addition, pregnant women are amongst the most vulnerable groups for malaria infection leading  
76 to higher morbidity and mortality of both mothers and fetuses.<sup>2</sup> Although around 1500 studies  
77 on the efficacy of antimalarials in malaria treatment have been conducted,<sup>3</sup> pregnant women  
78 have been excluded from the majority of clinical trials in the past, mainly because of safety  
79 concerns for the fetus.

80 Due to the lack of evidence for both efficacy and safety of antimalarials in pregnancy,  
81 quinine, rather than artemisinin-based combination therapy (ACT), has been recommended as  
82 the first-line treatment of uncomplicated *Plasmodium falciparum* malaria for pregnant women  
83 in the first trimester by the World Health Organization (WHO).<sup>4</sup> However, recent studies  
84 measuring the safety of artemisinin derivatives during pregnancy, including in the first  
85 trimester, have shown reassuring results<sup>5-8</sup> and it is likely that ACT will be recommended as  
86 the first-line treatment option for pregnant women regardless of the trimester in the next WHO  
87 guidelines.<sup>9</sup> Evidence on the treatment efficacy during pregnancy needs to be assembled.

88 The efficacy and safety of antimalarials in pregnancy can be different from the results  
89 from the non-pregnant populations because of altered immunity, physiological change in  
90 pharmacokinetics and sequestration of parasites to the placenta. The risk factors of treatment  
91 failure in pregnancy need to be assessed to improve clinical care in pregnancy. However, there  
92 are no agreed guidelines on how to assess the efficacy in pregnancy while it is standardised in  
93 the non-pregnant patients by WHO.<sup>10</sup> This lack of standard methodology makes it challenging  
94 to conduct efficacy studies in pregnancy and leads to the variability of assessing and reporting  
95 the outcomes.<sup>11,12</sup> Taken together, the current situation limits conducting aggregated data meta-  
96 analyses.<sup>12</sup>



1  
2  
3 97 The WorldWide Antimalarial Resistance Network (WWARN) has established a unique  
4  
5 98 individual participant data (IPD)-sharing platform facilitating large-scale pooled meta-analyses.  
6  
7  
8 99 We plan to include both published and unpublished studies exploring the efficacy and safety  
9  
10 100 of the treatment of malaria during pregnancy. We will conduct a one-stage IPD meta-analysis  
11  
12 101 on the currently recommended antimalarial drugs, i.e. artemisinin-based and quinine-based  
13  
14 102 treatments, used for the treatment of uncomplicated falciparum malaria in pregnancy.  
15  
16  
17  
18

## 19 103 Objectives

20  
21  
22 104 The aim of this study is to evaluate and compare treatment outcomes of artemisinin-  
23  
24 105 based and quinine-based treatment for uncomplicated falciparum malaria in pregnancy.  
25  
26

27 106 Primary objectives are:

- 28  
29  
30 107 • To compare antimalarial efficacies among artemisinin-based and quinine-based  
31  
32 108 treatments  
33  
34  
35 109 • To identify risk factors associated with treatment failure  
36  
37

38 110 Secondary objectives are:

- 39  
40  
41 111 • To assess the relationship between the dosing (dose per body weight) of  
42  
43 112 artemisinin-based treatments and treatment efficacy  
44  
45  
46 113 • To evaluate the risk of gametocyte carriage following artemisinin-based and  
47  
48 114 quinine-based treatments  
49  
50  
51  
52 115 • To evaluate the safety and tolerability of artemisinin-based and quinine-based  
53  
54 116 treatments  
55  
56  
57  
58  
59  
60

## 117 Methods and analyses

### 118 *Criteria for study eligibility*

#### 119 **Types of studies**

- 120 • Prospective clinical efficacy studies with a minimum 28-day active follow-up
- 121 • Both interventional and observational cohort studies regardless of the number of
- 122 treatment arms (i.e. comparative or single-arm)
- 123 • Genotyping conducted for distinguishing recrudescence and reinfection

124 The following studies will be excluded.

- 125 •  $\leq 10$  eligible pregnant women
- 126 • Conducted in non-endemic countries (i.e. returned travellers)

#### 127 **Types of participants**

- 128 • Pregnant women in any trimester
- 129 • Parasitologically confirmed *P. falciparum* parasitaemia
- 130 • Either asymptomatic or symptomatic

#### 131 **Types of intervention/exposure and controls**

- 132 • Treated with artemisinin-based or quinine-based treatments

#### 133 **Types of outcomes**

- 134 • Parasitological and clinical efficacy
- 135 • Adverse events

### 136 *Information sources and search strategy*

137 A systematic literature review was conducted to identify the potential studies to be  
138 included in this IPD meta-analysis. Seven databases (MEDLINE, Embase, Global Health,  
139 Cochrane Library, Scopus, Web of Science and Literatura Latino Americana em Ciências da  
140 Saúde) and two clinical trial registries (International Clinical Trials Registry Platform and  
141 ClinicalTrial.gov) were used. Both published and unpublished grey literature such as  
142 conference abstracts and registered trials were included. This systematic review and IPD meta-  
143 analysis is registered to PROSPERO (CRD42018104013), and the search terms and conditions  
144 are available there.

145 Briefly, the search combined five components: malaria; pregnancy; treatment or names  
146 of anti-malarial drugs; study design (interventional or observational cohort studies); and  
147 outcome types (efficacy) without limitation on publication year or language. The result of the  
148 literature search was published elsewhere.<sup>12</sup> The initial search was conducted on 9 July 2016.  
149 The final search will be updated in April 2019.

### 150 *Data acquisition and data management*

#### 151 **Collecting IPD**

152 Principal investigators of the published and unpublished studies identified by the  
153 systematic literature review will be invited to share their IPD with WWARN. Emails will be  
154 sent to the corresponding authors on at least three occasions asking whether they are willing to  
155 join the study group. A secure web-based platform has been developed by WWARN, and IPD  
156 will be uploaded after agreeing to the terms and conditions of the submission, retaining the  
157 ownership and full control of their shared data.<sup>13</sup> Data are fully anonymised and handled in  
158 compliance with the UK Data Protection Act to protect personal information and patient  
159 privacy. Original data are stored on a secure server hosted by the University of Oxford.

## 160 **Data management**

161 Raw data will be curated in a standardised format using the WWARN Clinical Module  
162 data management plan to facilitate pooled IPD meta-analyses.<sup>14</sup> After checking the raw data,  
163 any queries on the availability of data, ambiguity of the variables or potential errors will be  
164 resolved by asking the data contributors. The protocol of the original studies will be sought  
165 from the data contributors or the publication when available. The standardised dataset will be  
166 used for the analyses.

## 167 *Statistical analysis plan*

### 168 **Study populations**

169 Pregnant women will be eligible for the purpose of this analysis if they meet the  
170 following criteria:

- 171 • Confirmed pregnancy status on day 0 of the treatment
- 172 • Information on the type, date and dose of antimalarial drugs: artemisinin-based and  
173 quinine-based treatments will be included
- 174 • Baseline data on patient age and estimated gestational age (or trimester of  
175 pregnancy)
- 176 • Date of the last day of follow-up or length of follow-up

177 The following patients will be excluded:

- 178 • No or missing data on parasitological confirmation of *P. falciparum* infection at  
179 enrolment
- 180 • Presenting with severe malaria symptoms at enrolment as defined by WHO<sup>4</sup>,  
181 except uncomplicated hyperparasitaemia

## 182 **Outcomes**

183 The primary outcome will be the polymerase chain reaction (PCR)-corrected *P.*  
184 *falciparum* treatment failure. Secondary outcomes will include any recurrence of malaria  
185 (PCR-uncorrected treatment failure); parasite clearance; gametocyte carriage during follow up;  
186 and adverse events that developed after drug administration.

187 Recurrences of *P. falciparum* will be distinguished by PCR into recrudescence  
188 (treatment failure) and reinfection.<sup>15</sup> Indeterminate PCR will be excluded, and reinfection will  
189 be regarded as being censored on the day of recurrence in survival analyses for PCR-corrected  
190 outcomes following the WHO guidelines.<sup>10</sup> In studies where peripheral malaria smears were  
191 examined regularly (e.g. every week), the time of parasite recurrence will be defined as the  
192 time of the first positive parasite smear after the parasite clearance following the treatment. For  
193 pregnant women with no recurrent parasitaemia recorded, the day of their last negative smear  
194 will be regarded as their last visit and censoring time. In the case of intermittent follow-up (e.g.  
195 missed follow-ups), the following rules will be applied:

- 196 (i) Blood smears will be assumed negative between the two negative observations
- 197 (ii) If a patient came back to be followed up with a positive smear, the date of  
198 positive parasitaemia will be assumed to be the date of observation if this date is within 28 ( $\pm 3$ )  
199 days from the last observation
- 200 (iii) If parasite clearance is not recorded after treatment but the positive parasite  
201 count is recorded at least 7 days after starting the treatment, the day of the first positive count  
202 will be treated as the day of recurrence

203 Definitions of status and other censorship are detailed in the Clinical Module DMSAP<sup>14</sup>  
204 except for the above modification. The presence of parasitaemia within the first seven days will

1  
2  
3 205 not be regarded as treatment failure for quinine-based treatment because quinine is given for  
4  
5 206 seven days.

7  
8 207 Adverse symptoms will include: abdominal pain, dizziness, headache, body  
9  
10 208 pain/myalgia, weakness/fatigue, vomiting, nausea, anorexia and tinnitus if data permit.

### 13 209 **Variables and their definitions**

15  
16 210 The following baseline characteristics of patients will be included as appropriate if  
17  
18 211 enough data are shared: age; estimated gestational age (or trimester); parity or gravidity; weight  
19  
20 212 (weight before pregnancy and weight at treatment); body mass index (BMI); baseline  
21  
22 213 parasitaemia; presence of fever (body temperature > 37.5 degrees Celsius); haemoglobin (or  
23  
24 214 haematocrit); anaemia (Hb < 11 g/dL or Hct < 30% for anaemia and Hb < 7 g/dL or Hct < 20%  
25  
26 215 for severe anaemia);<sup>16</sup> gametocytes on presentation; past history of malaria or antimalaria use  
27  
28 216 description of infection (mixed species infections); total mg/kg dose for each drug component;  
29  
30 217 and supervision of drug administration. The doses of drugs received will be calculated from  
31  
32 218 the number of tablets administered to each patient. If the actual number of tablets received was  
33  
34 219 not recorded, doses according to the protocol will be used. Only those who completed the  
35  
36 220 standard dose will be included in the primary analysis. The proportion of partial treatment will  
37  
38 221 be presented.

39  
40  
41 222 For each study, study locations and local transmission intensity will be considered. The  
42  
43 223 study sites will be classified into three categories: low, medium and high malaria transmission  
44  
45 224 based on the parasite prevalence estimates obtained from the Malaria Atlas Project for specific  
46  
47 225 location and year of study.<sup>17,18</sup>

48  
49 226 *Plasmodium vivax* intercalated infection (i.e. *P. vivax* mono-infection before the  
50  
51 227 recurrence of *P. falciparum* parasitaemia) will be regarded as censored if the original study did  
52  
53 228 not test PCR for falciparum recurrences after intercalated vivax infection, following the WHO  
54  
55  
56  
57  
58  
59  
60

1  
2  
3 229 guidelines.<sup>10</sup> If the original study tested PCR for falciparum recurrences regardless of  
4  
5 230 intercalated vivax infection, vivax infection will be regarded as a time-dependent covariate.  
6  
7

### 8 231 **Descriptive summaries**

9  
10 232 A summary of the studies and baseline characteristics of the patients included in the  
11  
12 233 analysis will be presented. The number of available patients will be summarised for all  
13  
14 234 variables listed above, proportion will be used for categorical or binary variables, and mean  
15  
16 235 and standard deviation (or median and interquartile range) will be used for continuous variables.  
17  
18

19  
20 236 PCR-corrected and uncorrected outcomes will be used to compute the Kaplan-Meier  
21  
22 237 (K-M) estimates. The efficacy of each treatment will be summarised at fixed time points (i.e.  
23  
24 238 on day 28, 42, and 63) by constructing a chi-squared test statistics using the stratified (by study  
25  
26 239 sites) approach.<sup>19</sup>  
27  
28

### 29 240 **Analysis of primary outcome**

30  
31 241 A one-stage IPD meta-analysis using the Cox model with shared frailty will be  
32  
33 242 conducted to identify the risk factors of treatment failure as well as comparing different  
34  
35 243 treatments. Study sites will be fitted as random effects. For repeated episodes, if any, multi-  
36  
37 244 level mixed effects model (if there are enough data) or the previous history of malaria will be  
38  
39 245 used. If data permit, a non-linear relationship will be examined for continuous variables.<sup>20</sup> Cox-  
40  
41 246 Snell and Schoenfeld residuals will be examined to determine the appropriateness of model fit  
42  
43 247 and proportional hazard assumption, respectively. Alternative statistical approaches such as  
44  
45 248 flexible parametric models or introducing an interaction term with time will be considered if  
46  
47 249 the proportionality assumption is not satisfied.  
48  
49  
50  
51  
52  
53  
54  
55  
56  
57  
58  
59  
60

## 250 **Analyses of secondary outcomes**

251 Analysis of secondary outcomes will be carried out provided enough data are present;  
252 else, only summary statistics will be reported. Analyses similar to the primary outcome will be  
253 conducted for PCR-uncorrected treatment failure (i.e. any recurrence of malaria).

254 Parasite clearance will be assessed as the proportions of patients cleared asexual  
255 falciparum parasitaemia on day 1, 2 and 3. Univariable and multivariable mixed-effects logistic  
256 regression models (or Cox models for the time to parasite clearance) will be used to identify  
257 the risk factors associated with parasite positivity status.

258 Gametocyte carriage will be assessed as the proportion of patients with *P. falciparum*  
259 gametocytes on day 0, 3, 7, 14 or 21. Proportions after day 0 will be stratified by the presence  
260 of gametocytes at baseline. If enough data are available, mixed effects logistic regression  
261 models will be used to assess the risk factors for gametocytes carriage after treatment stratified  
262 by the presence of gametocytes at baseline.

263 Adverse effects will be assessed as the proportion of patients who developed symptoms  
264 after the treatment initiation. Proportions of patients who developed symptoms after day 0 will  
265 be stratified by whether or not that symptom was present before the treatment initiation. If  
266 enough data are available, mixed effects logistic regression models will be used to assess the  
267 risk factors of adverse symptoms developed after the treatment initiation. Symptoms on day 0  
268 (before treatment) will be added as a covariate. Primarily the symptoms developed in the first  
269 week will be included. Pregnancy outcomes and placental malaria may be assessed if enough  
270 data are gathered.

## 271 **Variable selection**

272 For any regression models, the following strategy recommended by Collet <sup>21</sup> will be  
273 used to determine independent risk factors. Initially, all possible risk factors will be examined



1  
2  
3 274 in the univariable model to assess if any of the variables are related to the treatment outcome.  
4  
5 275 All significant variables with a p-value  $\leq 0.05$  will then be added to the baseline model. The  
6  
7  
8 276 variables with a p-value of  $> 0.05$  will be excluded from the baseline model one by one starting  
9  
10 277 from the variable with the largest p-value. Once only significant covariates will remain in the  
11  
12 278 model, all excluded variables will be added to this model one by one to check whether there  
13  
14 279 will be any variables that become significant in the presence of other risk factors. Likelihood  
15  
16  
17 280 Ratio Test (LRT) and Akaike's Information Criterion (AIC) will be used to compare nested  
18  
19 281 and non-nested models, respectively. Treatment and baseline parasitaemia will be included in  
20  
21 282 the multivariable models on treatment efficacy as *a priori* forced variables regardless of the  
22  
23 283 statistical significance. Variables that are missing more than 50% will not be included in  
24  
25  
26 284 multivariable analyses.<sup>22</sup> Interaction between gravidity (parity) and endemicity, or age and  
27  
28 285 endemicity will be assessed if age or gravidity is included in the multivariable model, as the  
29  
30 286 impact of age and gravidity (i.e. pregnancy-specific immunity) can be different depending on  
31  
32  
33 287 the endemicity.<sup>23</sup>  
34  
35

### 288 **Assessment of statistical heterogeneity across studies**

36  
37  
38 289 The multilevel logistic or Cox models would be used for explaining the study-site  
39  
40 290 heterogeneity. Heterogeneity across study sites will be statistically assessed as the variance of  
41  
42  
43 291 the shared frailty term estimated in the random effect Cox model or variance of the random  
44  
45 292 intercepts in logistic regression. Additionally, the intra-class correlation in logistic regression  
46  
47 293 model will be reported.  
48  
49

### 294 **Subgroup analyses**

50  
51  
52 295 Analyses will be conducted by malaria transmission intensity and by treatment (for  
53  
54  
55 296 assessing dose impact of each drug) if data permit.  
56  
57  
58  
59  
60

## 297 **Sensitivity analyses**

298 Two types of sensitivity analyses will be performed. Firstly, a model will be refitted  
299 with excluding one study at a time to identify any influential studies. Secondly, to assess the  
300 impact of covariates with missing values, multiple imputation may be used.<sup>22</sup>

## 301 **Strength of the body of evidence / risk of bias across studies**

302 The risk of bias within and across the included studies will be assessed following the  
303 GRADE guidelines.<sup>24</sup> Publication bias will be evaluated by a funnel plot of the log-transformed  
304 hazards ratio (odds ratio or proportion),<sup>25</sup> if more than ten studies are included.<sup>26</sup> Despite the  
305 effort, all the studies identified in the systematic review may not be shared and included in this  
306 IPD meta-analysis. The bias by the studies that are unable to be included in the analyses will  
307 be evaluated.<sup>27</sup> The reported aggregated efficacy will be extracted from the publication and  
308 compared to the studies included. A two-stage meta-analysis combining shared and unshared  
309 data will be attempted if data permit.<sup>28</sup> The impact of artemisinin resistance in the study year  
310 at the study site will be evaluated by using the reported prevalence on molecular resistance  
311 marker (K-13).

## 312 **Further development of statistical analysis plan**

313 The main analysis is planned as described above. Modification or additional analyses  
314 may be required as the data collection progresses. Updated statistical analysis plans will be  
315 available at the WWARN website if an amendment is required.<sup>29</sup>

## 316 **Software**

317 Statistical analysis will be conducted using R (The R Foundation for Statistical  
318 Computing) or Stata MP 14.2 (College Station, Texas, USA).

## 319 *Patient and Public Involvement*

320 This IPD meta-analysis will use existing secondary data. Patients and public were not  
321 involved in the design, recruitment or conduct of this IPD meta-analysis. The results of this  
322 study will be shared with the primary investigators of the shared studies and disseminated as  
323 publications in open access journals.

## 324 **Ethics and dissemination**

325 This IPD meta-analysis met the criteria for waiver of ethical review as defined by the  
326 Oxford Tropical Research Ethics Committee (OxTREC) as the research consists of secondary  
327 analyses of existing anonymous data.<sup>30</sup> All studies included in this analysis will have received  
328 local ethical approvals.

329 Findings will be reported following the PRISMA-IPD guideline<sup>31</sup> at peer-reviewed  
330 journals with open access. The progress will be updated on our study group website.<sup>29</sup> This  
331 protocol is reported following PRISMA-P guideline<sup>32,33</sup> and the systematic literature review  
332 and IPD meta-analysis is registered to PROSPERO (CRD42018104013). Any publications  
333 based on the findings of this IPD meta-analysis will be in accordance with the guidelines of the  
334 International Committee of Medical Journal Editors.

## 335 **Discussion**

336 This IPD meta-analysis will update the previous aggregated data meta-analyses that  
337 included only four or five RCTs.<sup>12,34</sup> In IPD meta-analyses, data from single-arm interventional  
338 or observational cohort studies can be included. As the data can be standardised and analysed  
339 in a uniform way, IPD meta-analyses are particularly useful when there is no standard study  
340 design such as in this case. Risk factors associated with treatment failures particularly the  
341 dosing of the currently used treatments can be assessed in IPD meta-analyses, but rarely in

1  
2  
3 342 aggregated data meta-analyses. Although meta-analyses of secondary data cannot include  
4  
5 343 variables that were not assessed in the original studies, the results of this IPD meta-analysis  
6  
7  
8 344 can identify the pregnant women in need of close clinical monitoring based on what is  
9  
10 345 commonly assessed. Despite the increased time and effort of gathering and standardising the  
11  
12 346 IPD, the advantages of IPD meta-analysis outweigh particularly for answering research  
13  
14  
15 347 questions on these neglected or understudied populations.  
16

17  
18 348 WWARN has developed the secure and equitable data platform and the international  
19  
20 349 collaborative network of malaria researchers worldwide over the last decade. With this unique  
21  
22 350 collaborative effort, we hope that these findings will lead to the improvement of clinical  
23  
24  
25 351 management of this vulnerable but understudied population.  
26  
27  
28

## 29 352 Author Contributions

30  
31  
32 353 MS, RoM and PG conceived the idea. MS and RM drafted the manuscript. KK, FN,  
33  
34 354 RoM, PG and KS critically revised the manuscript. All authors have read and approved the  
35  
36  
37 355 final manuscript.  
38  
39  
40

## 41 356 Funding

42  
43  
44 357 The WorldWide Antimalarial Resistance Network (WWARN) is funded by Bill and  
45  
46 358 Melinda Gates Foundation. SMRU is part of the Mahidol Oxford University Research Unit  
47  
48  
49 359 supported by the Wellcome Trust of Great Britain. MS is supported by the University of Oxford  
50  
51 360 Clarendon Fund. The funders did not participate in the study development, the writing of the  
52  
53 361 paper, decision to publish, or preparation of the manuscript.  
54  
55  
56  
57  
58  
59  
60

## 362 Competing interests

363 None declared.

## 364 Ethics approval

365 This individual patient data meta-analysis met the criteria for waiver of ethical review  
366 as defined by the Oxford Tropical Research Ethics Committee (OxTREC) since the research  
367 consists of secondary analyses of existing anonymous data. Each study included in the analysis  
368 will have received local ethics approvals.

## 369 Acknowledgement

370 We would like to thank Dr Mary Ellen Gilder for her contribution to the previous systematic  
371 literature review and Dr Prabin Dahal for his comments on the draft.

## 372 References

- 373 1. Dellicour S, Tatem AJ, Guerra CA, et al. Quantifying the number of pregnancies at risk of  
374 malaria in 2007: a demographic study. *PLoS Med* 2010;7(1):e1000221.
- 375 2. Rogerson SJ, Desai M, Mayor A, et al. Burden, pathology, and costs of malaria in pregnancy:  
376 new developments for an old problem. *Lancet Infect Dis* 2018;18(4):e107-e18.
- 377 3. WorldWide Antimalarial Resistance Network. WWARN clinical trials publication library  
378 2017 [cited 20 March 2019] Available from: [https://www.wwarn.org/tools-](https://www.wwarn.org/tools-resources/literature-reviews/wwarn-clinical-trials-publication-library)  
379 [resources/literature-reviews/wwarn-clinical-trials-publication-library](https://www.wwarn.org/tools-resources/literature-reviews/wwarn-clinical-trials-publication-library).
- 380 4. World Health Organization. Guidelines for the treatment of malaria. Third edition. Geneva:  
381 World Health Organization 2015.
- 382 5. Dellicour S, Sevene E, McGready R, et al. First-trimester artemisinin derivatives and quinine  
383 treatments and the risk of adverse pregnancy outcomes in Africa and Asia: A meta-  
384 analysis of observational studies. *PLoS Med* 2017;14(5):e1002290.
- 385 6. Kovacs SD, van Eijk AM, Sevene E, et al. The Safety of Artemisinin Derivatives for the  
386 Treatment of Malaria in the 2nd or 3rd Trimester of Pregnancy: A Systematic Review  
387 and Meta-Analysis. *PLoS One* 2016;11(11):e0164963.
- 388 7. McGready R, Lee SJ, Wiladphaingern J, et al. Adverse effects of falciparum and vivax  
389 malaria and the safety of antimalarial treatment in early pregnancy: a population-based  
390 study. *Lancet Infect Dis* 2012;12(5):388-96.

- 391 8. Moore KA, Simpson JA, Paw MK, et al. Safety of artemisinins in first trimester of  
392 prospectively followed pregnancies: an observational study. *Lancet Infect Dis*  
393 2016;16(5):576-83.
- 394 9. WHO Malaria Policy Advisory Committee Secretariat. Malaria Policy Advisory Committee  
395 to the WHO: conclusions and recommendations of eighth biannual meeting (September  
396 2015). *Malar J* 2016;15:117.
- 397 10. World Health Organization. Methods for surveillance of antimalarial drug efficacy.  
398 Geneva: World Health Organization 2009.
- 399 11. Saito M, Gilder ME, Nosten F, et al. Methodology of assessment and reporting of safety in  
400 anti-malarial treatment efficacy studies of uncomplicated falciparum malaria in  
401 pregnancy: a systematic literature review. *Malar J* 2017;16:491.
- 402 12. Saito M, Gilder ME, Nosten F, et al. Systematic literature review and meta-analysis of the  
403 efficacy of artemisinin-based and quinine-based treatments for uncomplicated  
404 falciparum malaria in pregnancy: methodological challenges. *Malar J* 2017;16:488.
- 405 13. WorldWide Antimalarial Resistance Network (WWARN). Terms of Submission 2017  
406 [cited 5 July 2018]. Available from: [http://www.wwarn.org/tools-resources/terms-](http://www.wwarn.org/tools-resources/terms-submission)  
407 [submission](http://www.wwarn.org/tools-resources/terms-submission).
- 408 14. WorldWide Antimalarial Resistance Network (WWARN). Clinical Module: Data  
409 Management and Statistical Analysis Plan Version 1.2. 2012 [cited 5 July 2018].  
410 Available from: <http://www.wwarn.org/sites/default/files/ClinicalDMSAP.pdf>.
- 411 15. World Health Organization. Methods and techniques for clinical trials on antimalarial drug  
412 efficacy: Genotyping to identify parasite populations. Geneva: World Health  
413 Organization 2008.
- 414 16. World Health Organization. Haemoglobin concentrations for the diagnosis of anaemia and  
415 assessment of severity. Geneva: World Health Organization 2011.
- 416 17. Bhatt S, Weiss DJ, Cameron E, et al. The effect of malaria control on *Plasmodium*  
417 *falciparum* in Africa between 2000 and 2015. *Nature* 2015;526(7572):207-11.
- 418 18. Gething PW, Patil AP, Smith DL, et al. A new world malaria map: *Plasmodium falciparum*  
419 endemicity in 2010. *Malar J* 2011;10:378.
- 420 19. Klein JP, Logan B, Harhoff M, et al. Analyzing survival curves at a fixed point in time.  
421 *Stat Med* 2007;26(24):4505-19.
- 422 20. Royston P, Sauerbrei W. Fractional Polynomials for One Variable. Multivariable Model-  
423 building: A pragmatic approach to regression analysis based on fractional polynomials  
424 for modelling continuous variables. Chichester, UK: John Wiley & Sons 2008:71-98.
- 425 21. Collett D. 3.6 Strategy for model selection. In: Collett D, ed. Modelling survival data in  
426 medical research Third edition. New York: CRC Press 2015:83-90.
- 427 22. White IR, Royston P, Wood AM. Multiple imputation using chained equations: Issues and  
428 guidance for practice. *Stat Med* 2011;30(4):377-99.
- 429 23. Rogerson SJ, Hviid L, Duffy PE, et al. Malaria in pregnancy: pathogenesis and immunity.  
430 *Lancet Infect Dis* 2007;7(2):105-17.
- 431 24. Guyatt G, Oxman AD, Akl EA, et al. GRADE guidelines: 1. Introduction—GRADE  
432 evidence profiles and summary of findings tables. *J Clin Epidemiol* 2011;64(4):383-  
433 94.
- 434 25. Silcocks P. Hazard ratio funnel plots for survival comparisons. *J Epidemiol Community*  
435 *Health* 2009;63(10):856-61.
- 436 26. Sterne JA, Sutton AJ, Ioannidis JP, et al. Recommendations for examining and interpreting  
437 funnel plot asymmetry in meta-analyses of randomised controlled trials. *BMJ*  
438 2011;343:d4002.

- 1  
2  
3 439 27. Ahmed I, Sutton AJ, Riley RD. Assessment of publication bias, selection bias, and  
4 440 unavailable data in meta-analyses using individual participant data: a database survey.  
5 441 *BMJ* 2012;344  
6 442 28. Riley RD, Lambert PC, Abo-Zaid G. Meta-analysis of individual participant data: rationale,  
7 443 conduct, and reporting. *BMJ* 2010;340:c221.  
8 444 29. WorldWide Antimalarial Resistance Network (WWARN). Malaria in pregnancy treatment  
9 445 efficacy study group 2016 [cited 5 July 2018]. Available from:  
10 446 <http://www.wwarn.org/working-together/study-groups/malaria-pregnancy-treatment->  
11 447 [efficacy-study-group.](http://www.wwarn.org/working-together/study-groups/malaria-pregnancy-treatment-)  
12 448 30. Oxford Tropical Research Ethics Committee. 2018 [cited 23 October 2018]. Available  
13 449 from: <https://researchsupport.admin.ox.ac.uk/governance/ethics/committees/oxtrece>.  
14 450 31. Stewart LA, Clarke M, Rovers M, et al. Preferred Reporting Items for Systematic Review  
15 451 and Meta-Analyses of individual participant data: the PRISMA-IPD Statement. *JAMA*  
16 452 2015;313(16):1657-65.  
17 453 32. Shamseer L, Moher D, Clarke M, et al. Preferred reporting items for systematic review and  
18 454 meta-analysis protocols (PRISMA-P) 2015: elaboration and explanation. *BMJ*  
19 455 2015;349  
20 456 33. Moher D, Shamseer L, Clarke M, et al. Preferred reporting items for systematic review and  
21 457 meta-analysis protocols (PRISMA-P) 2015 statement. *Systematic Reviews* 2015;4(1):1.  
22 458 34. Burger RJ, van Eijk AM, Bussink M, et al. Artemisinin-based combination therapy versus  
23 459 quinine or other combinations for treatment of uncomplicated *Plasmodium falciparum*  
24 460 malaria in the second and third trimester of pregnancy: a systematic review and meta-  
25 461 analysis. *Open Forum Infect Dis* 2016;3(1):ofv170.

462



## PRISMA-P 2015 Checklist

This checklist has been adapted for use with protocol submissions to *Systematic Reviews* from Table 3 in Moher D et al: Preferred reporting items for systematic review and meta-analysis protocols (PRISMA-P) 2015 statement. *Systematic Reviews* 2015 4:1

| Section/topic                     | #  | Checklist item                                                                                                                                                                                  | Information reported                |                          | Line number(s) |
|-----------------------------------|----|-------------------------------------------------------------------------------------------------------------------------------------------------------------------------------------------------|-------------------------------------|--------------------------|----------------|
|                                   |    |                                                                                                                                                                                                 | Yes                                 | No                       |                |
| <b>ADMINISTRATIVE INFORMATION</b> |    |                                                                                                                                                                                                 |                                     |                          |                |
| <b>Title</b>                      |    |                                                                                                                                                                                                 |                                     |                          |                |
| Identification                    | 1a | Identify the report as a protocol of a systematic review                                                                                                                                        | <input checked="" type="checkbox"/> | <input type="checkbox"/> | 2-3            |
| Update                            | 1b | If the protocol is for an update of a previous systematic review, identify as such                                                                                                              | <input type="checkbox"/>            | <input type="checkbox"/> | NA             |
| <b>Registration</b>               | 2  | If registered, provide the name of the registry (e.g., PROSPERO) and registration number in the Abstract                                                                                        | <input checked="" type="checkbox"/> | <input type="checkbox"/> | 53             |
| <b>Authors</b>                    |    |                                                                                                                                                                                                 |                                     |                          |                |
| Contact                           | 3a | Provide name, institutional affiliation, and e-mail address of all protocol authors; provide physical mailing address of corresponding author                                                   | <input checked="" type="checkbox"/> | <input type="checkbox"/> | 5-20           |
| Contributions                     | 3b | Describe contributions of protocol authors and identify the guarantor of the review                                                                                                             | <input checked="" type="checkbox"/> | <input type="checkbox"/> | 346-349        |
| <b>Amendments</b>                 | 4  | If the protocol represents an amendment of a previously completed or published protocol, identify as such and list changes; otherwise, state plan for documenting important protocol amendments | <input type="checkbox"/>            | <input type="checkbox"/> | NA             |
| <b>Support</b>                    |    |                                                                                                                                                                                                 |                                     |                          |                |
| Sources                           | 5a | Indicate sources of financial or other support for the review                                                                                                                                   | <input checked="" type="checkbox"/> | <input type="checkbox"/> | 350-355        |
| Sponsor                           | 5b | Provide name for the review funder and/or sponsor                                                                                                                                               | <input checked="" type="checkbox"/> | <input type="checkbox"/> | 350-355        |
| Role of sponsor/funder            | 5c | Describe roles of funder(s), sponsor(s), and/or institution(s), if any, in developing the protocol                                                                                              | <input checked="" type="checkbox"/> | <input type="checkbox"/> | 350-355        |
| <b>INTRODUCTION</b>               |    |                                                                                                                                                                                                 |                                     |                          |                |
| <b>Rationale</b>                  | 6  | Describe the rationale for the review in the context of what is already known                                                                                                                   | <input checked="" type="checkbox"/> | <input type="checkbox"/> | 78-94          |
| <b>Objectives</b>                 | 7  | Provide an explicit statement of the question(s) the review will address with reference to participants, interventions, comparators, and outcomes (PICO)                                        | <input checked="" type="checkbox"/> | <input type="checkbox"/> | 95-114         |



| Section/topic                      | #   | Checklist item                                                                                                                                                                                                                              | Information reported |                          | Line number(s) |
|------------------------------------|-----|---------------------------------------------------------------------------------------------------------------------------------------------------------------------------------------------------------------------------------------------|----------------------|--------------------------|----------------|
|                                    |     |                                                                                                                                                                                                                                             | Yes                  | No                       |                |
| <b>METHODS</b>                     |     |                                                                                                                                                                                                                                             |                      |                          |                |
| Eligibility criteria               | 8   | Specify the study characteristics (e.g., PICO, study design, setting, time frame) and report characteristics (e.g., years considered, language, publication status) to be used as criteria for eligibility for the review                   | ✓                    | <input type="checkbox"/> | 116-133        |
| Information sources                | 9   | Describe all intended information sources (e.g., electronic databases, contact with study authors, trial registers, or other grey literature sources) with planned dates of coverage                                                        | ✓                    | <input type="checkbox"/> | 135-141        |
| Search strategy                    | 10  | Present draft of search strategy to be used for at least one electronic database, including planned limits, such that it could be repeated                                                                                                  | ✓                    | <input type="checkbox"/> | 135-147        |
| <b>STUDY RECORDS</b>               |     |                                                                                                                                                                                                                                             |                      |                          |                |
| Data management                    | 11a | Describe the mechanism(s) that will be used to manage records and data throughout the review                                                                                                                                                | ✓                    | <input type="checkbox"/> | 158-165        |
| Selection process                  | 11b | State the process that will be used for selecting studies (e.g., two independent reviewers) through each phase of the review (i.e., screening, eligibility, and inclusion in meta-analysis)                                                 | ✓                    | <input type="checkbox"/> | 134-157        |
| Data collection process            | 11c | Describe planned method of extracting data from reports (e.g., piloting forms, done independently, in duplicate), any processes for obtaining and confirming data from investigators                                                        | ✓                    | <input type="checkbox"/> | 149-165        |
| Data items                         | 12  | List and define all variables for which data will be sought (e.g., PICO items, funding sources), any pre-planned data assumptions and simplifications                                                                                       | ✓                    | <input type="checkbox"/> | 209-228        |
| Outcomes and prioritization        | 13  | List and define all outcomes for which data will be sought, including prioritization of main and additional outcomes, with rationale                                                                                                        | ✓                    | <input type="checkbox"/> | 182-208        |
| Risk of bias in individual studies | 14  | Describe anticipated methods for assessing risk of bias of individual studies, including whether this will be done at the outcome or study level, or both; state how this information will be used in data synthesis                        | ✓                    | <input type="checkbox"/> | 295-309        |
| <b>DATA</b>                        |     |                                                                                                                                                                                                                                             |                      |                          |                |
| Synthesis                          | 15a | Describe criteria under which study data will be quantitatively synthesized                                                                                                                                                                 | ✓                    | <input type="checkbox"/> | 182-228        |
|                                    | 15b | If data are appropriate for quantitative synthesis, describe planned summary measures, methods of handling data, and methods of combining data from studies, including any planned exploration of consistency (e.g., $I^2$ , Kendall's tau) | ✓                    | <input type="checkbox"/> | 229-291        |
|                                    | 15c | Describe any proposed additional analyses (e.g., sensitivity or subgroup analyses, meta-regression)                                                                                                                                         | ✓                    | <input type="checkbox"/> | 292-300        |
|                                    | 15d | If quantitative synthesis is not appropriate, describe the type of summary planned                                                                                                                                                          | ✓                    | <input type="checkbox"/> | 307-309        |

| Section/topic                            | #  | Checklist item                                                                                                              | Information reported                |                          | Line number(s) |
|------------------------------------------|----|-----------------------------------------------------------------------------------------------------------------------------|-------------------------------------|--------------------------|----------------|
|                                          |    |                                                                                                                             | Yes                                 | No                       |                |
| <b>Meta-bias(es)</b>                     | 16 | Specify any planned assessment of meta-bias(es) (e.g., publication bias across studies, selective reporting within studies) | <input checked="" type="checkbox"/> | <input type="checkbox"/> | 301-309        |
| <b>Confidence in cumulative evidence</b> | 17 | Describe how the strength of the body of evidence will be assessed (e.g., GRADE)                                            | <input checked="" type="checkbox"/> | <input type="checkbox"/> | 302-303        |

For peer review only

# BMJ Open

## The efficacy of artemisinin-based and quinine-based treatments for uncomplicated falciparum malaria in pregnancy: a protocol for systematic review and individual patient data (IPD) meta-analysis

|                                 |                                                                                                                                                                                                                                                                                                                                                                                                                                                                                                                                                                                                                                                                                                                                                                                                                                                                                                                                                                                                                                                                                                                                                                                                                                                                                                                                                                                                                 |
|---------------------------------|-----------------------------------------------------------------------------------------------------------------------------------------------------------------------------------------------------------------------------------------------------------------------------------------------------------------------------------------------------------------------------------------------------------------------------------------------------------------------------------------------------------------------------------------------------------------------------------------------------------------------------------------------------------------------------------------------------------------------------------------------------------------------------------------------------------------------------------------------------------------------------------------------------------------------------------------------------------------------------------------------------------------------------------------------------------------------------------------------------------------------------------------------------------------------------------------------------------------------------------------------------------------------------------------------------------------------------------------------------------------------------------------------------------------|
| Journal:                        | <i>BMJ Open</i>                                                                                                                                                                                                                                                                                                                                                                                                                                                                                                                                                                                                                                                                                                                                                                                                                                                                                                                                                                                                                                                                                                                                                                                                                                                                                                                                                                                                 |
| Manuscript ID                   | bmjopen-2018-027503.R2                                                                                                                                                                                                                                                                                                                                                                                                                                                                                                                                                                                                                                                                                                                                                                                                                                                                                                                                                                                                                                                                                                                                                                                                                                                                                                                                                                                          |
| Article Type:                   | Protocol                                                                                                                                                                                                                                                                                                                                                                                                                                                                                                                                                                                                                                                                                                                                                                                                                                                                                                                                                                                                                                                                                                                                                                                                                                                                                                                                                                                                        |
| Date Submitted by the Author:   | 26-Jun-2019                                                                                                                                                                                                                                                                                                                                                                                                                                                                                                                                                                                                                                                                                                                                                                                                                                                                                                                                                                                                                                                                                                                                                                                                                                                                                                                                                                                                     |
| Complete List of Authors:       | Saito, Makoto; WorldWide Antimalarial Resistance Network (WWARN), ; University of Oxford, Centre for Tropical Disease and Global Health, Nuffield Department of Medicine<br>Mansoor, Rashid; WorldWide Antimalarial Resistance Network (WWARN); University of Oxford, Centre for Tropical Disease and Global Health, Nuffield Department of Medicine<br>Kennon, Kalynn; WorldWide Antimalarial Resistance Network (WWARN); University of Oxford, Centre for Tropical Disease and Global Health, Nuffield Department of Medicine<br>McGready, Rose; Shoklo Malaria Research Unit, Mahidol-Oxford Tropical Medicine Research Unit, Faculty of Tropical Medicine, Mahidol University; Centre for Tropical Medicine and Global Health, Nuffield Department of Medicine, University of Oxford<br>Nosten, François; Centre for Tropical Medicine and Global Health, Nuffield Department of Medicine, University of Oxford; Shoklo Malaria Research Unit, Mahidol-Oxford Tropical Medicine Research Unit, Faculty of Tropical Medicine, Mahidol University<br>Guerin, Philippe; WorldWide Antimalarial Resistance Network (WWARN); University of Oxford, Centre for Tropical Disease and Global Health, Nuffield Department of Medicine<br>Stepniewska, Kasia; WorldWide Antimalarial Resistance Network (WWARN); University of Oxford, Centre for Tropical Disease and Global Health, Nuffield Department of Medicine |
| <b>Primary Subject Heading</b>: | Infectious diseases                                                                                                                                                                                                                                                                                                                                                                                                                                                                                                                                                                                                                                                                                                                                                                                                                                                                                                                                                                                                                                                                                                                                                                                                                                                                                                                                                                                             |
| Secondary Subject Heading:      | Infectious diseases, Pharmacology and therapeutics, Obstetrics and gynaecology                                                                                                                                                                                                                                                                                                                                                                                                                                                                                                                                                                                                                                                                                                                                                                                                                                                                                                                                                                                                                                                                                                                                                                                                                                                                                                                                  |
| Keywords:                       | malaria, pregnancy, treatment efficacy, individual patient data meta-analysis, artemisinin, quinine                                                                                                                                                                                                                                                                                                                                                                                                                                                                                                                                                                                                                                                                                                                                                                                                                                                                                                                                                                                                                                                                                                                                                                                                                                                                                                             |
|                                 |                                                                                                                                                                                                                                                                                                                                                                                                                                                                                                                                                                                                                                                                                                                                                                                                                                                                                                                                                                                                                                                                                                                                                                                                                                                                                                                                                                                                                 |

1  
2  
3  
4  
5  
6  
7  
8  
9  
10  
11  
12  
13  
14  
15  
16  
17  
18  
19  
20  
21  
22  
23  
24  
25  
26  
27  
28  
29  
30  
31  
32  
33  
34  
35  
36  
37  
38  
39  
40  
41  
42  
43  
44  
45  
46  
47  
48  
49  
50  
51  
52  
53  
54  
55  
56  
57  
58  
59  
60

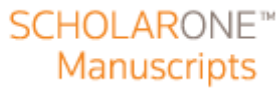

1 The efficacy of artemisinin-based and quinine-based treatments for uncomplicated  
2 falciparum malaria in pregnancy: a protocol for systematic review and individual patient data  
3 (IPD) meta-analysis

4  
5 Makoto Saito<sup>1,2,\*</sup>, Rashid Mansoor<sup>1,2</sup>, Kalynn Kennon<sup>1,2</sup>, Rose McGready<sup>2,3</sup>, François  
6 Nosten<sup>2,3</sup>, Philippe J Guérin<sup>1,2</sup>, Kasia Stepniewska<sup>1,2</sup>

7  
8 <sup>1</sup>WorldWide Antimalarial Resistance Network (WWARN), Oxford, UK

9 <sup>2</sup>Centre for Tropical Medicine and Global Health, Nuffield Department of Clinical  
10 Medicine, University of Oxford, Oxford, UK

11 <sup>3</sup>Shoklo Malaria Research Unit (SMRU), Mahidol-Oxford Tropical Medicine Research  
12 Unit, Faculty of Tropical Medicine, Mahidol University, Mae Sot, Tak, Thailand

13  
14 \* Corresponding to Makoto Saito

15 Address: Centre for Tropical Medicine and Global Health, NDM Research Building, Old Road  
16 Campus, Roosevelt Drive, Oxford, OX3 7FZ, UK

17 Tel: +44-01865 612900

18 E-mails: [makoto.saito@wwarn.org](mailto:makoto.saito@wwarn.org) (MS), [rashid.mansoor@wwarn.org](mailto:rashid.mansoor@wwarn.org) (RM),  
19 [kalynn.kennon@wwarn.org](mailto:kalynn.kennon@wwarn.org) (KK), [rose@shoklo-unit.com](mailto:rose@shoklo-unit.com) (RoM), [francois@tropmedres.ac](mailto:francois@tropmedres.ac)  
20 (FN), [philippe.guerin@wwarn.org](mailto:philippe.guerin@wwarn.org) (PG), [kasia.stepniewska@wwarn.org](mailto:kasia.stepniewska@wwarn.org) (KS)

21  
22 Word count: 2998

23 Key words: malaria, pregnancy, treatment efficacy, individual patient data meta-analysis,  
24 artemisinin, quinine

## 25 Abstract

### 26 *Introduction*

27 Pregnant women are more vulnerable to malaria leading to adverse impact on both  
28 mothers and fetuses. However, knowledge on the efficacy and safety of antimalarials in  
29 pregnancy is limited by the paucity of randomised control trials and the lack of standardised  
30 protocols in this special sub-population. Pooling individual patient data (IPD) for meta-analysis  
31 could address in part these limitations to summarise accurately the currently available evidence  
32 on treatment efficacy and risk factors for treatment failure.

### 33 *Methods and analysis*

34 To assess the treatment efficacy of artemisinin-based and quinine-based treatments for  
35 uncomplicated falciparum malaria in pregnancy, seven databases (MEDLINE, Embase, Global  
36 Health, Cochrane Library, Scopus, Web of Science and Literatura Latino Americana em  
37 Ciências da Saúde) and two clinical trial registries (International Clinical Trials Registry  
38 Platform and ClinicalTrial.gov) were searched. Both interventional and observational cohort  
39 studies following up for at least 28 days will be included. IPD of the identified eligible  
40 published or unpublished studies will be sought by inviting principal investigators. Raw IPD  
41 will be shared through the web-based secure platform developed by WorldWide Antimalarial  
42 Resistance Network using the established methodology. The primary objective is to compare  
43 the risk of polymerase chain reaction (PCR)-corrected treatment failure among different  
44 treatments and to find the risk factors. One-stage IPD meta-analysis by Cox model with shared  
45 frailty will be conducted. A risk of bias assessment will be conducted to address the impact of  
46 potential unshared data and of the quality of individual studies. Potential limitations include  
47 difficulty in acquiring the IPD and heterogeneity of the study designs due to the lack of standard.

## 48 *Ethics and Dissemination*

49 This IPD meta-analysis consists of secondary analyses of existing anonymous data and  
50 meets the criteria for waiver of ethics review by the Oxford Tropical Research Ethics  
51 Committee. The results of this IPD meta-analysis will be disseminated through open-access  
52 publications at peer-reviewed journals. The study results will lead to a better understanding of  
53 malaria treatment in pregnancy, which can be used for clinical decision-making and conducting  
54 further studies.

55 *PROSPERO registration number: CRD42018104013.*

## 56 Article Summary

### 57 *Strengths and limitations of this study*

- 58 • This study will be the first individual patient data (IPD) meta-analysis on the efficacy  
59 of currently recommended antimalarials in pregnancy incorporating IPD from both  
60 randomised control trials and single-arm cohort studies, overcoming the limitation of  
61 aggregated data meta-analysis that can only include randomised control trials.
- 62 • IPD that are standardised in the same format and analysed in a uniform way with  
63 adjustment of covariates will, in contrast to aggregated data, allow us to compare the  
64 efficacy of different treatments as well as to find risk factors for treatment failure in this  
65 vulnerable but understudied population.
- 66 • Limitations of this IPD meta-analysis include the potential difficulty in acquiring the  
67 IPD and the heterogeneity of the study designs, study population and parasite  
68 population. A risk of bias assessment will be conducted to address the impact of  
69 potential unshared data and of the quality of individual studies.

## 70 Introduction

71 About 60% of all pregnancies are estimated to take place in malaria-endemic areas.<sup>1</sup> In  
72 addition, pregnant women are amongst the most vulnerable groups for malaria infection leading  
73 to higher morbidity and mortality of both mothers and fetuses.<sup>2</sup> Although around 1500 studies  
74 on the efficacy of antimalarials in malaria treatment have been conducted,<sup>3</sup> pregnant women  
75 have been excluded from the majority of clinical trials in the past, mainly because of safety  
76 concerns for the fetus.

77 Due to the lack of evidence for both efficacy and safety of antimalarials in pregnancy,  
78 quinine, rather than artemisinin-based combination therapy (ACT), has been recommended as  
79 the first-line treatment of uncomplicated *Plasmodium falciparum* malaria for pregnant women  
80 in the first trimester by the World Health Organization (WHO).<sup>4</sup> However, recent studies  
81 measuring the safety of artemisinin derivatives during pregnancy, including in the first  
82 trimester, have shown reassuring results<sup>5-8</sup> and it is likely that ACT will be recommended as  
83 the first-line treatment option for pregnant women regardless of the trimester in the next WHO  
84 treatment guidelines.<sup>9</sup> Evidence on the treatment efficacy during pregnancy needs to be  
85 assembled.

86 The efficacy and safety of antimalarials in pregnancy can be different from the results  
87 from the non-pregnant populations because of altered immunity, physiological change in  
88 pharmacokinetics and sequestration of parasites to the placenta. The risk factors for treatment  
89 failure in pregnancy need to be assessed to improve clinical care in pregnancy. However, there  
90 are no agreed guidelines on how to assess the efficacy in pregnancy while it is standardised in  
91 the non-pregnant patients by WHO.<sup>10</sup> This lack of standard methodology makes it challenging  
92 to conduct efficacy studies in pregnancy and leads to the variability of assessing and reporting



1  
2  
3 93 the outcomes.<sup>11 12</sup> Taken together, the current situation limits conducting aggregated data meta-  
4  
5 94 analyses.<sup>12</sup>  
6  
7

8 95 The WorldWide Antimalarial Resistance Network (WWARN) has established a unique  
9  
10 96 individual participant data (IPD)-sharing platform facilitating large-scale pooled meta-analyses.  
11  
12  
13 97 We plan to include both published and unpublished studies exploring the efficacy and safety  
14  
15 98 of the treatment of malaria during pregnancy. We will conduct a one-stage IPD meta-analysis  
16  
17 99 on the currently recommended antimalarial drugs, i.e. artemisinin-based and quinine-based  
18  
19  
20 100 treatments, used for the treatment of uncomplicated falciparum malaria in pregnancy.  
21  
22  
23

## 24 101 Objectives

25  
26  
27 102 The aim of this study is to evaluate and compare treatment outcomes of artemisinin-  
28  
29 103 based and quinine-based treatment for uncomplicated falciparum malaria in pregnancy.  
30  
31

32 104 Primary objectives are:

- 33  
34  
35 105 • To compare antimalarial efficacies among artemisinin-based and quinine-based  
36  
37 106 treatments
- 38  
39  
40 107 • To identify risk factors associated with treatment failure

41  
42  
43 108 Secondary objectives are:

- 44  
45  
46 109 • To assess the relationship between the dosing (dose per body weight) of  
47  
48 110 artemisinin-based treatments and treatment efficacy
- 49  
50  
51 111 • To evaluate the risk of gametocyte carriage following artemisinin-based and  
52  
53 112 quinine-based treatments
- 54  
55  
56 113 • To evaluate the safety and tolerability of artemisinin-based and quinine-based  
57  
58 114 treatments

## 115 Methods and analyses

### 116 *Criteria for study eligibility*

#### 117 **Types of studies**

- 118 • Prospective clinical efficacy studies with a minimum 28-day active follow-up
- 119 • Both interventional and observational cohort studies regardless of the number of  
120 treatment arms (i.e. comparative or single arm)
- 121 • Genotyping conducted for distinguishing recrudescence and reinfection

122 The following studies will be excluded.

- 123 •  $\leq 10$  eligible pregnant women
- 124 • Conducted in non-endemic countries (i.e. returned travellers)

#### 125 **Types of participants**

- 126 • Pregnant women in any trimester
- 127 • Parasitologically confirmed *P. falciparum* parasitaemia
- 128 • Either asymptomatic or symptomatic

#### 129 **Types of intervention/exposure and controls**

- 130 • Treated with artemisinin-based or quinine-based treatments

#### 131 **Types of outcomes**

- 132 • Parasitological and clinical efficacy
- 133 • Adverse events

### 134 *Information sources and search strategy*

135 A systematic literature review was conducted to identify the potential studies to be  
136 included in this IPD meta-analysis. Seven databases (MEDLINE, Embase, Global Health,  
137 Cochrane Library, Scopus, Web of Science and Literatura Latino Americana em Ciências da  
138 Saúde) and two clinical trial registries (International Clinical Trials Registry Platform and  
139 ClinicalTrial.gov) were used. Both published and unpublished grey literature such as  
140 conference abstracts and registered trials were included. This systematic review and IPD meta-  
141 analysis is registered to PROSPERO (CRD42018104013), and the search terms and conditions  
142 are available there.

143 Briefly, the search combined five components: malaria; pregnancy; treatment or names  
144 of anti-malarial drugs; study design (interventional or observational cohort studies); and  
145 outcome types (efficacy) without limitation on publication year or language. The result of the  
146 literature search was published elsewhere.<sup>12</sup> The initial search was conducted on 9 July 2016.  
147 The final search will be updated in April 2019.

### 148 *Data acquisition and data management*

#### 149 **Collecting IPD**

150 Principal investigators of the published and unpublished studies identified by the  
151 systematic literature review will be invited to share their IPD with WWARN. Emails will be  
152 sent to the corresponding authors on at least three occasions asking whether they are willing to  
153 join the study group. A secure web-based platform has been developed by WWARN, and IPD  
154 will be uploaded after agreeing to the terms and conditions of the submission, retaining the  
155 ownership and full control of their shared data.<sup>13</sup> Data are fully anonymised and handled in  
156 compliance with the UK Data Protection Act to protect personal information and patient  
157 privacy. Original data are stored on a secure server hosted by the University of Oxford.

## 158 **Data management**

159 Raw data will be curated in a standardised format using the WWARN Clinical Module  
160 data management plan to facilitate pooled IPD meta-analyses.<sup>14</sup> After checking the raw data,  
161 any queries on the availability of data, ambiguity of the variables or potential errors will be  
162 resolved by asking the data contributors. The protocol of the original studies will be sought  
163 from the data contributors or the publication when available. The standardised dataset will be  
164 used for the analyses.

## 165 *Statistical analysis plan*

### 166 **Study populations**

167 Pregnant women will be eligible for the purpose of this analysis if they meet the  
168 following criteria:

- 169 • Confirmed pregnancy status on day 0 of the treatment
- 170 • Information on the type, date and dose of antimalarial drugs: artemisinin-based and  
171 quinine-based treatments will be included
- 172 • Baseline data on patient age and estimated gestational age (or trimester of  
173 pregnancy)
- 174 • Date of the last day of follow-up or length of follow-up

175 The following patients will be excluded:

- 176 • No or missing data on parasitological confirmation of *P. falciparum* infection at  
177 enrolment
- 178 • Presenting with severe malaria symptoms at enrolment as defined by WHO<sup>4</sup>,  
179 except hyperparasitaemia and severe anaemia, which will be included

## 180 **Outcomes**

181 The primary outcome will be the polymerase chain reaction (PCR)-corrected *P.*  
182 *falciparum* treatment failure. Secondary outcomes will include any recurrence of malaria  
183 (PCR-uncorrected treatment failure); parasite clearance; gametocyte carriage during follow up;  
184 and adverse events that developed after drug administration.

185 Recurrences of *P. falciparum* will be distinguished by PCR into recrudescence  
186 (treatment failure) and reinfection.<sup>15</sup> Indeterminate PCR will be excluded, and reinfection will  
187 be regarded as being censored on the day of recurrence in survival analyses for PCR-corrected  
188 outcomes following the WHO guidelines.<sup>10</sup> In studies where peripheral malaria smears were  
189 examined regularly (e.g. every week), the time of parasite recurrence will be defined as the  
190 time of the first positive parasite smear after the parasite clearance following the treatment. For  
191 pregnant women with no recurrent parasitaemia recorded, the day of their last negative smear  
192 will be regarded as their last visit and censoring time. In the case of intermittent follow-up (e.g.  
193 missed follow-ups), the following rules will be applied:

- 194 (i) Blood smears will be assumed negative between the two negative observations
- 195 (ii) If a patient came back to be followed up with a positive smear, the date of  
196 positive parasitaemia will be assumed to be the date of observation if this date is within 28 ( $\pm 3$ )  
197 days from the last observation
- 198 (iii) If parasite clearance is not recorded after treatment but the positive parasite  
199 count is recorded at least 7 days after starting the treatment, the day of the first positive count  
200 will be treated as the day of recurrence

201 Definitions of status and other censorship are detailed in the Clinical Module data  
202 management plan<sup>14</sup> except for the above modification. The presence of parasitaemia within

1  
2  
3 203 the first seven days will not be regarded as treatment failure for quinine-based treatment  
4  
5 204 because quinine is given for seven days.

6  
7  
8 205 Adverse symptoms will include abdominal pain, dizziness, headache, body  
9  
10 206 pain/myalgia, weakness/fatigue, vomiting, nausea, anorexia and tinnitus if data permit.

### 11 12 13 207 **Variables and their definitions**

14  
15  
16 208 The following baseline characteristics of patients will be included as appropriate if  
17  
18 209 enough data are shared: age; estimated gestational age (or trimester); parity or gravidity; weight  
19  
20 210 (weight before pregnancy and weight at treatment); body mass index (BMI); baseline  
21  
22 211 parasitaemia; presence of fever (body temperature > 37.5 degrees Celsius); haemoglobin (or  
23  
24 212 haematocrit); anaemia (haemoglobin < 11 g/dL or haematocrit < 30% for anaemia and  
25  
26 213 haemoglobin < 7 g/dL or haematocrit < 20% for severe anaemia);<sup>16</sup> gametocytes on  
27  
28 214 presentation; past history of malaria or antimalaria use; description of infection (mixed species  
29  
30 215 infections); total mg/kg dose for each drug component; and supervision of drug administration.  
31  
32 216 The doses of drugs received will be calculated from the number of tablets administered to each  
33  
34 217 patient. If the actual number of tablets received was not recorded, doses according to the  
35  
36 218 protocol will be used. Only those who completed the standard dose will be included in the  
37  
38 219 primary analysis. The proportion of partial treatment will be presented.

39  
40  
41 220 For each study, study locations and local transmission intensity will be considered. The  
42  
43 221 study sites will be classified into three categories: low, medium and high malaria transmission  
44  
45 222 based on the parasite prevalence estimates obtained from the Malaria Atlas Project for specific  
46  
47 223 location and year of study.<sup>17 18</sup>

48  
49 224 *Plasmodium vivax* intercalated infection (i.e. *P. vivax* mono-infection before the  
50  
51 225 recurrence of *P. falciparum* parasitaemia) will be regarded as censored if the original study did  
52  
53 226 not test PCR for falciparum recurrences after intercalated vivax infection, following the WHO  
54  
55  
56  
57  
58  
59  
60

1  
2  
3 227 guidelines.<sup>10</sup> If the original study tested PCR for falciparum recurrences regardless of  
4  
5 228 intercalated vivax infection, vivax infection will be regarded as a time-dependent covariate.  
6  
7

### 8 229 **Descriptive summaries**

9  
10 230 A summary of the studies and baseline characteristics of the patients included in the  
11  
12 231 analysis will be presented. The number of available patients will be summarised for all  
13  
14 232 variables listed above, proportion will be used for categorical or binary variables, and mean  
15  
16 233 and standard deviation (or median and interquartile range) will be used for continuous variables.  
17  
18

19  
20 234 PCR-corrected and uncorrected outcomes will be used to compute the Kaplan-Meier  
21  
22 235 (K-M) estimates for each study site. The efficacy of each treatment will then be summarised at  
23  
24 236 fixed time points (i.e. on day 28, 42, and 63) by the aggregated meta-analysis approach.  
25  
26  
27

### 28 237 **Analysis of primary outcome**

29  
30 238 A one-stage IPD meta-analysis using the Cox model with shared frailty for study sites  
31  
32 239 will be conducted to identify the risk factors for treatment failure as well as comparing different  
33  
34 240 treatments. For repeated episodes, if any, multi-level mixed-effects model (if there are enough  
35  
36 241 data) or the previous history of malaria will be used. If data permit, a non-linear relationship  
37  
38 242 will be examined for continuous variables.<sup>19</sup> Cox-Snell and Schoenfeld residuals will be  
39  
40 243 examined to determine the appropriateness of model fit and proportional hazard assumption,  
41  
42 244 respectively. Alternative statistical approaches such as flexible parametric models or  
43  
44 245 introducing an interaction term with time will be considered if the proportionality assumption  
45  
46 246 is not satisfied.  
47  
48  
49  
50

### 51 247 **Analyses of secondary outcomes**

52  
53 248 Analysis of secondary outcomes will be carried out provided enough data are present;  
54  
55 249 else, only summary statistics will be reported. Analyses similar to the primary outcome will be  
56  
57 250 conducted for PCR-uncorrected treatment failure (i.e. any recurrence of malaria).  
58  
59  
60

1  
2  
3 251 Parasite clearance will be assessed as the proportions of patients cleared asexual  
4  
5 252 falciparum parasitaemia on day 1, 2 and 3. Univariable and multivariable mixed-effects logistic  
6  
7 253 regression models (or Cox models for the time to parasite clearance) will be used to identify  
8  
9 254 the risk factors associated with parasite positivity status.  
10  
11  
12

13 255 Gametocyte carriage will be assessed as the proportion of patients with *P. falciparum*  
14  
15 256 gametocytes on day 0, 3, 7, 14 or 21. Proportions after day 0 will be stratified by the presence  
16  
17 257 of gametocytes at baseline. If enough data are available, mixed-effects logistic regression  
18  
19 258 models will be used to assess the risk factors for gametocytes carriage after treatment stratified  
20  
21 259 by the presence of gametocytes at baseline.  
22  
23  
24

25 260 Adverse effects will be assessed as the proportion of patients who developed symptoms  
26  
27 261 after the treatment initiation. Proportions of patients who developed symptoms after day 0 will  
28  
29 262 be stratified by whether or not that symptom was present before the treatment initiation. If  
30  
31 263 enough data are available, mixed-effects logistic regression models will be used to assess the  
32  
33 264 risk factors for adverse symptoms developed after the treatment initiation. Symptoms on day 0  
34  
35 265 (before treatment) will be added as a covariate. Primarily the symptoms developed in the first  
36  
37 266 week will be included. Pregnancy outcomes and placental malaria may be assessed if enough  
38  
39 267 data are gathered.  
40  
41  
42  
43

#### 44 268 **Variable selection**

45  
46 269 For any regression models, the following strategy recommended by Collet<sup>20</sup> will be  
47  
48 270 used to determine independent risk factors. Initially, all possible risk factors will be examined  
49  
50 271 in the univariable model to assess if any of the variables are related to the treatment outcome.  
51  
52 272 All significant variables with a p-value  $\leq 0.05$  will then be added to the baseline model. The  
53  
54 273 variables with a p-value of  $> 0.05$  will be excluded from the baseline model one by one starting  
55  
56 274 from the variable with the largest p-value. Once only significant covariates will remain in the  
57  
58  
59  
60



1  
2  
3 275 model, all excluded variables will be added to this model one by one to check whether there  
4  
5 276 will be any variables that become significant in the presence of other risk factors. Likelihood  
6  
7 277 Ratio Test (LRT) and Akaike's Information Criterion (AIC) will be used to compare nested  
8  
9 278 and non-nested models, respectively. Treatment and baseline parasitaemia will be included in  
10  
11 279 the multivariable models on treatment efficacy as *a priori* forced variables regardless of the  
12  
13 280 statistical significance. Variables that are missing more than 50% will not be included in  
14  
15 281 multivariable analyses.<sup>21</sup> Interaction between gravidity (parity) and endemicity, or age and  
16  
17 282 endemicity will be assessed if age or gravidity is included in the multivariable model, as the  
18  
19 283 impact of age and gravidity (i.e. pregnancy-specific immunity) can be different depending on  
20  
21 284 the endemicity.<sup>22</sup>

### 27 285 **Assessment of statistical heterogeneity across studies**

28  
29 286 The multilevel logistic or Cox models would be used for explaining the study-site  
30  
31 287 heterogeneity. Heterogeneity across study sites will be statistically assessed as the variance of  
32  
33 288 the shared frailty term estimated in the Cox model or variance of the random intercepts in  
34  
35 289 logistic regression. Additionally, the intra-class correlation in logistic regression model will be  
36  
37 290 reported.

### 41 291 **Subgroup analyses**

42  
43 292 Analyses will be conducted by malaria transmission intensity and by treatment (for  
44  
45 293 assessing dose impact of each drug) if data permit.

### 49 294 **Sensitivity analyses**

50  
51 295 Two types of sensitivity analyses will be performed. Firstly, a model will be refitted  
52  
53 296 with excluding one study at a time to identify any influential studies. Secondly, to assess the  
54  
55 297 impact of covariates with missing values, multiple imputation may be used.<sup>21</sup>

### 298 **Strength of the body of evidence / risk of bias across studies**

299 The risk of bias within and across the included studies will be assessed following the  
300 GRADE guidelines.<sup>23</sup> Publication bias will be evaluated by a funnel plot of the log-transformed  
301 hazards ratio (odds ratio or proportion),<sup>24</sup> if more than ten studies are included.<sup>25</sup> Despite the  
302 effort, all the studies identified in the systematic review may not be shared and included in this  
303 IPD meta-analysis. The bias by the studies that are unable to be included in the analyses will  
304 be evaluated.<sup>26</sup> The reported aggregated efficacy will be extracted from the publication and  
305 compared with the studies included. A two-stage meta-analysis combining shared and unshared  
306 data will be attempted if data permit.<sup>27</sup> The impact of artemisinin resistance in the study year  
307 at the study site will be evaluated by using the reported prevalence on molecular resistance  
308 marker (K-13).

### 309 **Further development of statistical analysis plan**

310 The main analysis is planned as described above. Modification or additional analyses  
311 may be required as the data collection progresses. Updated statistical analysis plans will be  
312 available at the WWARN website if an amendment is required.<sup>28</sup>

### 313 **Software**

314 Statistical analysis will be conducted using R (The R Foundation for Statistical  
315 Computing, Vienna, Austria) or Stata MP 15.1 (StataCorp, College Station, Texas, USA).

### 316 *Patient and Public Involvement*

317 This IPD meta-analysis will use existing secondary data. Patients and public were not  
318 involved in the design, recruitment or conduct of this IPD meta-analysis. The results of this  
319 study will be shared with the primary investigators of the shared studies and disseminated as  
320 publications in open access journals.

## 321 Ethics and dissemination

322 This IPD meta-analysis met the criteria for waiver of ethics review as defined by the  
323 Oxford Tropical Research Ethics Committee (OxTREC) as the research consists of secondary  
324 analyses of existing anonymous data.<sup>29</sup> All studies included in this analysis will have received  
325 local ethical approvals.

326 Findings will be reported following the PRISMA-IPD guideline<sup>30</sup> at peer-reviewed  
327 journals with open access. The progress will be updated on our study group website.<sup>28</sup> This  
328 protocol is reported following PRISMA-P guideline<sup>31 32</sup> and the systematic literature review  
329 and IPD meta-analysis is registered to PROSPERO (CRD42018104013). Any publications  
330 based on the findings of this IPD meta-analysis will be in accordance with the guidelines of the  
331 International Committee of Medical Journal Editors.

## 332 Discussion

333 This IPD meta-analysis will update the previous aggregated data meta-analyses that  
334 included only four or five RCTs.<sup>12 33</sup> In IPD meta-analyses, data from single-arm interventional  
335 or observational cohort studies can be included. As the data can be standardised and analysed  
336 in a uniform way, IPD meta-analyses are particularly useful when there is no standard study  
337 design such as in this case. Risk factors associated with treatment failures particularly the  
338 dosing of the currently used treatments can be assessed in IPD meta-analyses, but rarely in  
339 aggregated data meta-analyses. Although meta-analyses of secondary data cannot include  
340 variables that were not assessed in the original studies, the results of this IPD meta-analysis  
341 can identify the pregnant women in need of close clinical monitoring based on what is  
342 commonly assessed. Despite the increased time and effort of gathering and standardising the

1  
2  
3 343 IPD, the advantages of IPD meta-analysis outweigh particularly for answering research  
4  
5 344 questions on these neglected or understudied populations.  
6  
7

8 345 WWARN has developed the secure and equitable data platform and the international  
9  
10 346 collaborative network of malaria researchers worldwide over the last decade. With this unique  
11  
12 347 collaborative effort, we hope that these findings will lead to the improvement of clinical  
13  
14 348 management of this vulnerable but understudied population.  
15  
16  
17  
18

## 19 349 Author Contributions

20  
21  
22 350 MS, RoM and PG conceived the idea. MS and RM drafted the manuscript. KK, FN,  
23  
24 351 RoM, PG and KS critically revised the manuscript. All authors have read and approved the  
25  
26 352 final manuscript.  
27  
28  
29  
30

## 31 353 Funding

32  
33  
34 354 The WorldWide Antimalarial Resistance Network (WWARN) is funded by the Bill and  
35  
36 355 Melinda Gates Foundation and the ExxonMobil Foundation. SMRU is part of the Mahidol  
37  
38 356 Oxford University Research Unit supported by the Wellcome Trust of Great Britain. MS is  
39  
40 357 supported by the University of Oxford Clarendon Fund. The funders did not participate in the  
41  
42 358 study development, the writing of the paper, decision to publish, or preparation of the  
43  
44 359 manuscript.  
45  
46  
47  
48  
49

## 50 360 Competing interests

51  
52  
53 361 None declared.  
54  
55  
56  
57  
58  
59  
60

## 362 Ethics approval

363 This individual patient data meta-analysis met the criteria for waiver of ethics review  
364 as defined by the Oxford Tropical Research Ethics Committee (OxTREC) since the research  
365 consists of secondary analyses of existing anonymous data. Each study included in the analysis  
366 will have received local ethics approvals.

## 367 Acknowledgement

368 We would like to thank Dr Mary Ellen Gilder for her contribution to the previous systematic  
369 literature review and Dr Prabin Dahal for his comments on the draft.

## 370 References

- 371 1. Dellicour S, Tatem AJ, Guerra CA, et al. Quantifying the number of pregnancies at risk of  
372 malaria in 2007: a demographic study. *PLoS Med* 2010;7(1):e1000221. doi:  
373 10.1371/journal.pmed.1000221
- 374 2. Rogerson SJ, Desai M, Mayor A, et al. Burden, pathology, and costs of malaria in pregnancy:  
375 new developments for an old problem. *Lancet Infect Dis* 2018;18(4):e107-e18. doi:  
376 10.1016/S1473-3099(18)30066-5
- 377 3. WorldWide Antimalarial Resistance Network. WWARN clinical trials publication library  
378 2017 [cited 20 March 2019]. Available from: [https://www.wwarn.org/tools-](https://www.wwarn.org/tools-resources/literature-reviews/wwarn-clinical-trials-publication-library)  
379 [resources/literature-reviews/wwarn-clinical-trials-publication-library](https://www.wwarn.org/tools-resources/literature-reviews/wwarn-clinical-trials-publication-library).
- 380 4. World Health Organization. Guidelines for the treatment of malaria. Third edition. Geneva:  
381 WHO Press 2015.
- 382 5. Dellicour S, Sevene E, McGready R, et al. First-trimester artemisinin derivatives and quinine  
383 treatments and the risk of adverse pregnancy outcomes in Africa and Asia: A meta-  
384 analysis of observational studies. *PLoS Med* 2017;14(5):e1002290. doi:  
385 10.1371/journal.pmed.1002290
- 386 6. Kovacs SD, van Eijk AM, Sevene E, et al. The Safety of Artemisinin Derivatives for the  
387 Treatment of Malaria in the 2nd or 3rd Trimester of Pregnancy: A Systematic Review  
388 and Meta-Analysis. *PLoS One* 2016;11(11):e0164963. doi:  
389 10.1371/journal.pone.0164963
- 390 7. McGready R, Lee SJ, Wiladphaingern J, et al. Adverse effects of falciparum and vivax  
391 malaria and the safety of antimalarial treatment in early pregnancy: a population-based  
392 study. *Lancet Infect Dis* 2012;12(5):388-96. doi: 10.1016/S1473-3099(11)70339-5
- 393 8. Moore KA, Simpson JA, Paw MK, et al. Safety of artemisinins in first trimester of  
394 prospectively followed pregnancies: an observational study. *Lancet Infect Dis*  
395 2016;16(5):576-83. doi: 10.1016/s1473-3099(15)00547-2

1  
2  
3  
4  
5  
6  
7  
8  
9  
10  
11  
12  
13  
14  
15  
16  
17  
18  
19  
20  
21  
22  
23  
24  
25  
26  
27  
28  
29  
30  
31  
32  
33  
34  
35  
36  
37  
38  
39  
40  
41  
42  
43  
44  
45  
46  
47  
48  
49  
50  
51  
52  
53  
54  
55  
56  
57  
58  
59  
60

- 396 9. WHO Malaria Policy Advisory Committee Secretariat. Malaria Policy Advisory Committee  
397 to the WHO: conclusions and recommendations of eighth biannual meeting (September  
398 2015). *Malar J* 2016;15:117. doi: 10.1186/s12936-016-1169-x
- 399 10. World Health Organization. Methods for surveillance of antimalarial drug efficacy.  
400 Geneva: WHO Press 2009.
- 401 11. Saito M, Gilder ME, Nosten F, et al. Methodology of assessment and reporting of safety in  
402 anti-malarial treatment efficacy studies of uncomplicated falciparum malaria in  
403 pregnancy: a systematic literature review. *Malar J* 2017;16:491. doi: 10.1186/s12936-  
404 017-2136-x
- 405 12. Saito M, Gilder ME, Nosten F, et al. Systematic literature review and meta-analysis of the  
406 efficacy of artemisinin-based and quinine-based treatments for uncomplicated  
407 falciparum malaria in pregnancy: methodological challenges. *Malar J* 2017;16:488.  
408 doi: 10.1186/s12936-017-2135-y
- 409 13. WorldWide Antimalarial Resistance Network (WWARN). Terms of Submission 2017  
410 [cited 5 July 2018]. Available from: [http://www.wwarn.org/tools-resources/terms-  
411 submission](http://www.wwarn.org/tools-resources/terms-submission).
- 412 14. WorldWide Antimalarial Resistance Network (WWARN). Clinical Module: Data  
413 Management and Statistical Analysis Plan Version 1.2. 2012 [cited 5 July 2018].  
414 Available from: <http://www.wwarn.org/sites/default/files/ClinicalDMSAP.pdf>.
- 415 15. World Health Organization. Methods and techniques for clinical trials on antimalarial drug  
416 efficacy: Genotyping to identify parasite populations. Geneva: WHO Press 2008.
- 417 16. World Health Organization. Haemoglobin concentrations for the diagnosis of anaemia and  
418 assessment of severity. Geneva: WHO Press 2011.
- 419 17. Bhatt S, Weiss DJ, Cameron E, et al. The effect of malaria control on Plasmodium  
420 falciparum in Africa between 2000 and 2015. *Nature* 2015;526(7572):207-11. doi:  
421 10.1038/nature15535
- 422 18. Gething PW, Patil AP, Smith DL, et al. A new world malaria map: Plasmodium falciparum  
423 endemicity in 2010. *Malar J* 2011;10:378. doi: 10.1186/1475-2875-10-378
- 424 19. Royston P, Sauerbrei W. Fractional Polynomials for One Variable. Multivariable Model-  
425 building: A pragmatic approach to regression analysis based on fractional polynomials  
426 for modelling continuous variables. Chichester, UK: John Wiley & Sons 2008:71-98.
- 427 20. Collett D. 3.6 Strategy for model selection. Modelling survival data in medical research  
428 Third edition. New York: CRC Press 2015:83-90.
- 429 21. White IR, Royston P, Wood AM. Multiple imputation using chained equations: Issues and  
430 guidance for practice. *Stat Med* 2011;30(4):377-99. doi: 10.1002/sim.4067
- 431 22. Rogerson SJ, Hviid L, Duffy PE, et al. Malaria in pregnancy: pathogenesis and immunity.  
432 *Lancet Infect Dis* 2007;7(2):105-17. doi: 10.1016/s1473-3099(07)70022-1
- 433 23. Guyatt G, Oxman AD, Akl EA, et al. GRADE guidelines: 1. Introduction—GRADE  
434 evidence profiles and summary of findings tables. *J Clin Epidemiol* 2011;64(4):383-  
435 94. doi: 10.1016/j.jclinepi.2010.04.026
- 436 24. Silcocks P. Hazard ratio funnel plots for survival comparisons. *J Epidemiol Community  
437 Health* 2009;63(10):856-61. doi: 10.1136/jech.2008.075069
- 438 25. Sterne JA, Sutton AJ, Ioannidis JP, et al. Recommendations for examining and interpreting  
439 funnel plot asymmetry in meta-analyses of randomised controlled trials. *BMJ*  
440 2011;343:d4002. doi: 10.1136/bmj.d4002
- 441 26. Ahmed I, Sutton AJ, Riley RD. Assessment of publication bias, selection bias, and  
442 unavailable data in meta-analyses using individual participant data: a database survey.  
443 *BMJ* 2012;344 doi: 10.1136/bmj.d7762
- 444 27. Riley RD, Lambert PC, Abo-Zaid G. Meta-analysis of individual participant data: rationale,  
445 conduct, and reporting. *BMJ* 2010;340:c221. doi: 10.1136/bmj.c221

- 1  
2  
3 446 28. WorldWide Antimalarial Resistance Network (WWARN). Malaria in pregnancy treatment  
4 447 efficacy study group 2016 [cited 5 July 2018]. Available from:  
5 448 [http://www.wwarn.org/working-together/study-groups/malaria-pregnancy-treatment-  
7 449 efficacy-study-group](http://www.wwarn.org/working-together/study-groups/malaria-pregnancy-treatment-<br/>6 449 efficacy-study-group).  
8 450 29. Oxford Tropical Research Ethics Committee. 2018 [cited 23 October 2018]. Available  
9 451 from:<https://researchsupport.admin.ox.ac.uk/governance/ethics/committees/oxtrac>.  
10 452 30. Stewart LA, Clarke M, Rovers M, et al. Preferred Reporting Items for Systematic Review  
11 453 and Meta-Analyses of individual participant data: the PRISMA-IPD Statement. *JAMA*  
12 454 2015;313(16):1657-65. doi: 10.1001/jama.2015.3656  
13 455 31. Shamseer L, Moher D, Clarke M, et al. Preferred reporting items for systematic review and  
14 456 meta-analysis protocols (PRISMA-P) 2015: elaboration and explanation. *BMJ*  
15 457 2015;349 doi: 10.1136/bmj.g7647  
16 458 32. Moher D, Shamseer L, Clarke M, et al. Preferred reporting items for systematic review and  
17 459 meta-analysis protocols (PRISMA-P) 2015 statement. *Systematic Reviews* 2015;4(1):1.  
18 460 doi: 10.1186/2046-4053-4-1  
19 461 33. Burger RJ, van Eijk AM, Bussink M, et al. Artemisinin-based combination therapy versus  
20 462 quinine or other combinations for treatment of uncomplicated Plasmodium falciparum  
21 463 malaria in the second and third trimester of pregnancy: a systematic review and meta-  
22 464 analysis. *Open Forum Infect Dis* 2016;3(1):ofv170. doi: 10.1093/ofid/ofv170  
23  
24  
25  
26 465  
27  
28  
29  
30  
31  
32  
33  
34  
35  
36  
37  
38  
39  
40  
41  
42  
43  
44  
45  
46  
47  
48  
49  
50  
51  
52  
53  
54  
55  
56  
57  
58  
59  
60



## PRISMA-P 2015 Checklist

This checklist has been adapted for use with protocol submissions to *Systematic Reviews* from Table 3 in Moher D et al: Preferred reporting items for systematic review and meta-analysis protocols (PRISMA-P) 2015 statement. *Systematic Reviews* 2015 4:1

| Section/topic                     | #  | Checklist item                                                                                                                                                                                  | Information reported                |                          | Line number(s) |
|-----------------------------------|----|-------------------------------------------------------------------------------------------------------------------------------------------------------------------------------------------------|-------------------------------------|--------------------------|----------------|
|                                   |    |                                                                                                                                                                                                 | Yes                                 | No                       |                |
| <b>ADMINISTRATIVE INFORMATION</b> |    |                                                                                                                                                                                                 |                                     |                          |                |
| <b>Title</b>                      |    |                                                                                                                                                                                                 |                                     |                          |                |
| Identification                    | 1a | Identify the report as a protocol of a systematic review                                                                                                                                        | <input checked="" type="checkbox"/> | <input type="checkbox"/> | 2-3            |
| Update                            | 1b | If the protocol is for an update of a previous systematic review, identify as such                                                                                                              | <input type="checkbox"/>            | <input type="checkbox"/> | NA             |
| <b>Registration</b>               | 2  | If registered, provide the name of the registry (e.g., PROSPERO) and registration number in the Abstract                                                                                        | <input checked="" type="checkbox"/> | <input type="checkbox"/> | 53             |
| <b>Authors</b>                    |    |                                                                                                                                                                                                 |                                     |                          |                |
| Contact                           | 3a | Provide name, institutional affiliation, and e-mail address of all protocol authors; provide physical mailing address of corresponding author                                                   | <input checked="" type="checkbox"/> | <input type="checkbox"/> | 5-20           |
| Contributions                     | 3b | Describe contributions of protocol authors and identify the guarantor of the review                                                                                                             | <input checked="" type="checkbox"/> | <input type="checkbox"/> | 346-349        |
| <b>Amendments</b>                 | 4  | If the protocol represents an amendment of a previously completed or published protocol, identify as such and list changes; otherwise, state plan for documenting important protocol amendments | <input type="checkbox"/>            | <input type="checkbox"/> | NA             |
| <b>Support</b>                    |    |                                                                                                                                                                                                 |                                     |                          |                |
| Sources                           | 5a | Indicate sources of financial or other support for the review                                                                                                                                   | <input checked="" type="checkbox"/> | <input type="checkbox"/> | 350-355        |
| Sponsor                           | 5b | Provide name for the review funder and/or sponsor                                                                                                                                               | <input checked="" type="checkbox"/> | <input type="checkbox"/> | 350-355        |
| Role of sponsor/funder            | 5c | Describe roles of funder(s), sponsor(s), and/or institution(s), if any, in developing the protocol                                                                                              | <input checked="" type="checkbox"/> | <input type="checkbox"/> | 350-355        |
| <b>INTRODUCTION</b>               |    |                                                                                                                                                                                                 |                                     |                          |                |
| <b>Rationale</b>                  | 6  | Describe the rationale for the review in the context of what is already known                                                                                                                   | <input checked="" type="checkbox"/> | <input type="checkbox"/> | 78-94          |
| <b>Objectives</b>                 | 7  | Provide an explicit statement of the question(s) the review will address with reference to participants, interventions, comparators, and outcomes (PICO)                                        | <input checked="" type="checkbox"/> | <input type="checkbox"/> | 95-114         |



| Section/topic                             | #   | Checklist item                                                                                                                                                                                                                              | Information reported |                          | Line number(s) |
|-------------------------------------------|-----|---------------------------------------------------------------------------------------------------------------------------------------------------------------------------------------------------------------------------------------------|----------------------|--------------------------|----------------|
|                                           |     |                                                                                                                                                                                                                                             | Yes                  | No                       |                |
| <b>METHODS</b>                            |     |                                                                                                                                                                                                                                             |                      |                          |                |
| <b>Eligibility criteria</b>               | 8   | Specify the study characteristics (e.g., PICO, study design, setting, time frame) and report characteristics (e.g., years considered, language, publication status) to be used as criteria for eligibility for the review                   | ✓                    | <input type="checkbox"/> | 116-133        |
| <b>Information sources</b>                | 9   | Describe all intended information sources (e.g., electronic databases, contact with study authors, trial registers, or other grey literature sources) with planned dates of coverage                                                        | ✓                    | <input type="checkbox"/> | 135-141        |
| <b>Search strategy</b>                    | 10  | Present draft of search strategy to be used for at least one electronic database, including planned limits, such that it could be repeated                                                                                                  | ✓                    | <input type="checkbox"/> | 135-147        |
| <b>STUDY RECORDS</b>                      |     |                                                                                                                                                                                                                                             |                      |                          |                |
| Data management                           | 11a | Describe the mechanism(s) that will be used to manage records and data throughout the review                                                                                                                                                | ✓                    | <input type="checkbox"/> | 158-165        |
| Selection process                         | 11b | State the process that will be used for selecting studies (e.g., two independent reviewers) through each phase of the review (i.e., screening, eligibility, and inclusion in meta-analysis)                                                 | ✓                    | <input type="checkbox"/> | 134-157        |
| Data collection process                   | 11c | Describe planned method of extracting data from reports (e.g., piloting forms, done independently, in duplicate), any processes for obtaining and confirming data from investigators                                                        | ✓                    | <input type="checkbox"/> | 149-165        |
| <b>Data items</b>                         | 12  | List and define all variables for which data will be sought (e.g., PICO items, funding sources), any pre-planned data assumptions and simplifications                                                                                       | ✓                    | <input type="checkbox"/> | 209-228        |
| <b>Outcomes and prioritization</b>        | 13  | List and define all outcomes for which data will be sought, including prioritization of main and additional outcomes, with rationale                                                                                                        | ✓                    | <input type="checkbox"/> | 182-208        |
| <b>Risk of bias in individual studies</b> | 14  | Describe anticipated methods for assessing risk of bias of individual studies, including whether this will be done at the outcome or study level, or both; state how this information will be used in data synthesis                        | ✓                    | <input type="checkbox"/> | 295-309        |
| <b>DATA</b>                               |     |                                                                                                                                                                                                                                             |                      |                          |                |
| <b>Synthesis</b>                          | 15a | Describe criteria under which study data will be quantitatively synthesized                                                                                                                                                                 | ✓                    | <input type="checkbox"/> | 182-228        |
|                                           | 15b | If data are appropriate for quantitative synthesis, describe planned summary measures, methods of handling data, and methods of combining data from studies, including any planned exploration of consistency (e.g., $I^2$ , Kendall's tau) | ✓                    | <input type="checkbox"/> | 229-291        |
|                                           | 15c | Describe any proposed additional analyses (e.g., sensitivity or subgroup analyses, meta-regression)                                                                                                                                         | ✓                    | <input type="checkbox"/> | 292-300        |
|                                           | 15d | If quantitative synthesis is not appropriate, describe the type of summary planned                                                                                                                                                          | ✓                    | <input type="checkbox"/> | 307-309        |

1  
2  
3  
4  
5  
6  
7  
8  
9  
10  
11  
12  
13  
14  
15  
16  
17  
18  
19  
20  
21  
22  
23  
24  
25  
26  
27  
28  
29  
30  
31  
32  
33  
34  
35  
36  
37  
38  
39  
40  
41  
42  
43  
44  
45  
46

| Section/topic                     | #  | Checklist item                                                                                                              | Information reported                |                          | Line number(s) |
|-----------------------------------|----|-----------------------------------------------------------------------------------------------------------------------------|-------------------------------------|--------------------------|----------------|
|                                   |    |                                                                                                                             | Yes                                 | No                       |                |
| Meta-bias(es)                     | 16 | Specify any planned assessment of meta-bias(es) (e.g., publication bias across studies, selective reporting within studies) | <input checked="" type="checkbox"/> | <input type="checkbox"/> | 301-309        |
| Confidence in cumulative evidence | 17 | Describe how the strength of the body of evidence will be assessed (e.g., GRADE)                                            | <input checked="" type="checkbox"/> | <input type="checkbox"/> | 302-303        |

For peer review only
